# Supplementary material
Source: PubMed Central journal article supplement (PMC5340276)
Supplement: NIHMS847960-supplement-Supplementary_Material.pdf [file NIHMS847960-supplement-Supplementary_Material.pdf]

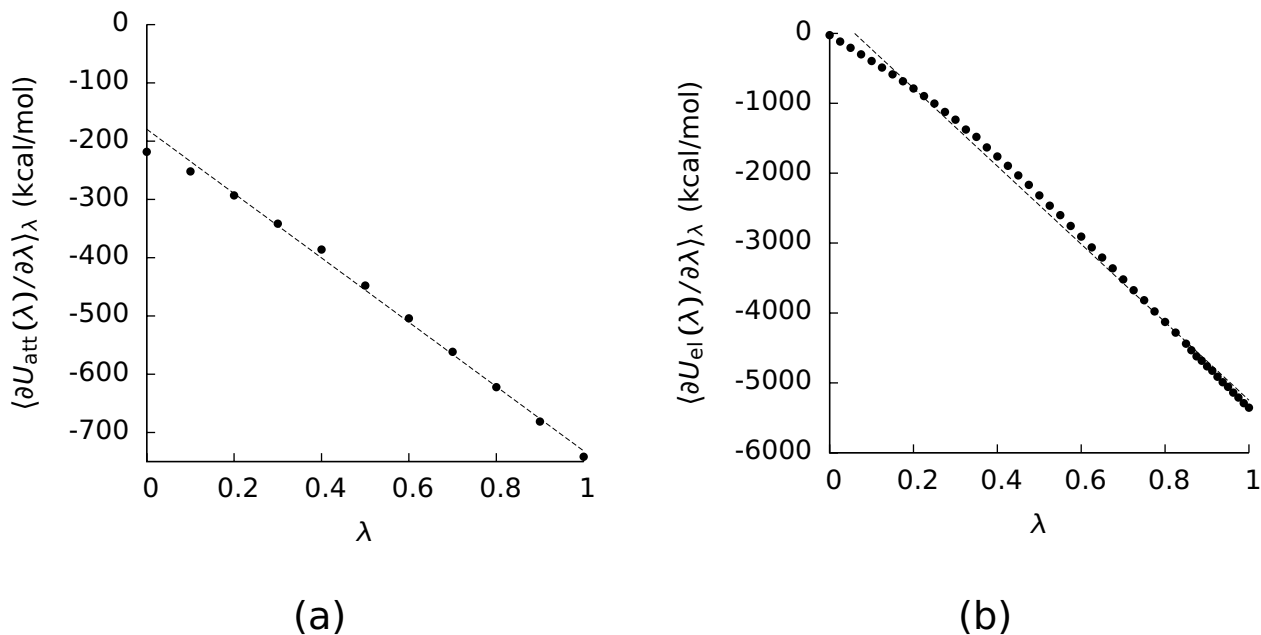

Figure 1: a) The derivative  $\langle \partial U_{\text{att}} / \partial \lambda \rangle_{\lambda}$  of the  $\lambda$ -dependent potential used to compute the attractive component ( $\Delta G_{\text{att}}$ ) of the Lennard-Jones cavity insertion energy ( $\Delta G_{\text{vdw}}$ ) as a function of the intergration coordinate ( $\lambda$ ), averaged over an ensemble where the interaction energy between an atom  $i$  in the solute and an atom  $j$  in the solvent was given by the  $\lambda$ -dependent potential ( $U_{\text{att}}^{ij}(\lambda)$ ), as defined in the Methods, for the 1BRS barnase-barstar complex. b) The derivative  $\langle \partial U_{\text{el}} / \partial \lambda \rangle_{\lambda}$  of the  $\lambda$ -dependent potential used to compute the electrostatic component ( $\Delta G_{\text{el}}$ ) of the solvation free energy ( $\Delta G$ ) as a function of the intergration coordinate ( $\lambda$ ), averaged over an ensemble where the interaction energy between an atom  $i$  in the solute and an atom  $j$  in the solvent was given by the  $\lambda$ -dependent potential ( $U_{\text{el}}^{ij}(\lambda)$ ), as defined in the Methods, for the 1BRS barnase-barstar complex. The dotted lines are least-squares lines drawn through the data. The squares ( $R^2$ ) of the Pearson correlation coefficients are a) 0.994 and b) 0.995.

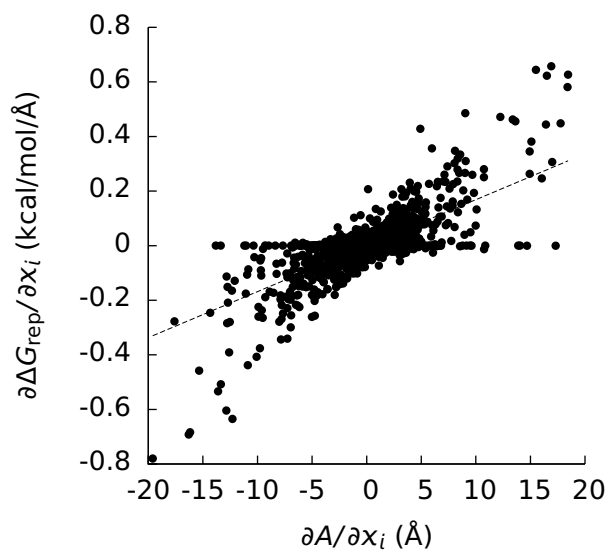

(a)

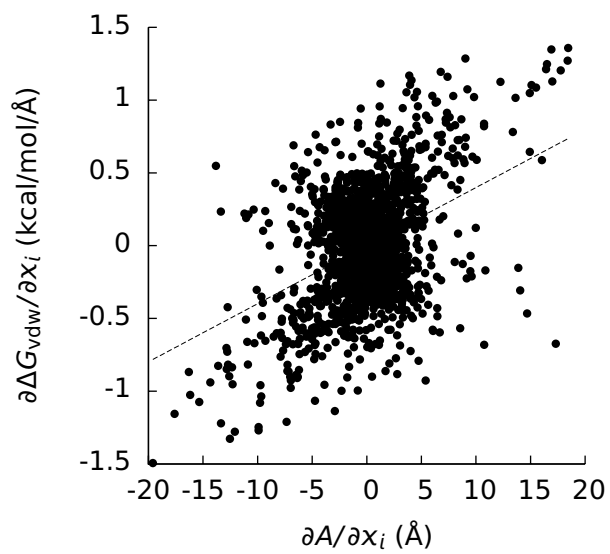

(b)

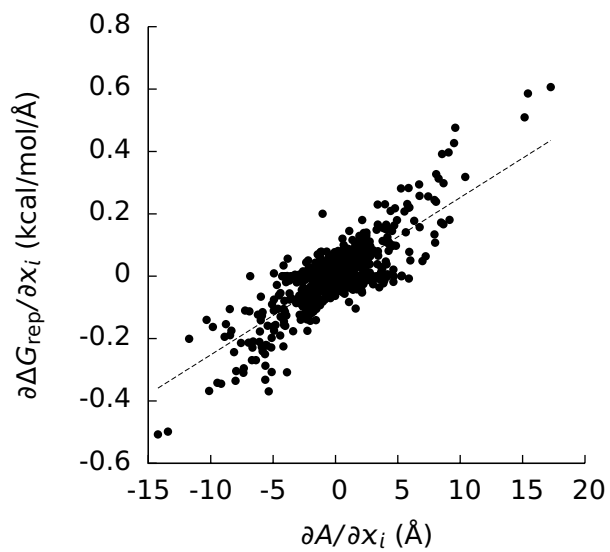

(c)

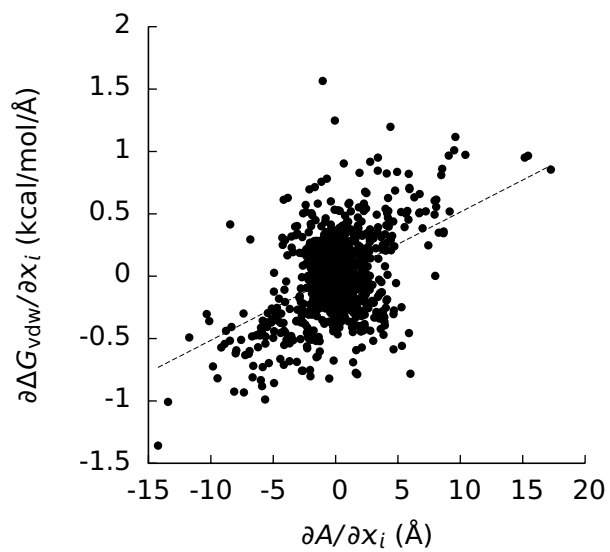

(d)

Figure 2: a) The derivative ( $\partial\Delta G_{\text{rep}}/\partial x_i$ ) of the repulsive component ( $\Delta G_{\text{rep}}$ ) of the Lennard-Jones cavity insertion free energy ( $\Delta G_{\text{vdw}}$ ) with respect to the coordinates ( $x_i$ ) of the atomic centers versus the derivative ( $\partial A/\partial x_i$ ) of the solvent-accessible area ( $A$ ) with respect to  $x_i$  for the first component of the 1ACB complex. b)  $\partial\Delta G_{\text{vdw}}/\partial x_i$  versus  $\partial A/\partial x_i$  for the first component of the 1ACB complex. c)  $\partial\Delta G_{\text{rep}}/\partial x_i$  versus  $\partial A/\partial x_i$  for the second component of the 1ACB complex. d)  $\partial\Delta G_{\text{vdw}}/\partial x_i$  versus  $\partial A/\partial x_i$  for the second component of the 1ACB complex. The dotted lines are least-squares lines drawn through the data. The slopes and squares of the Pearson correlation coefficients of these lines can be found in Table 1 of the main text.

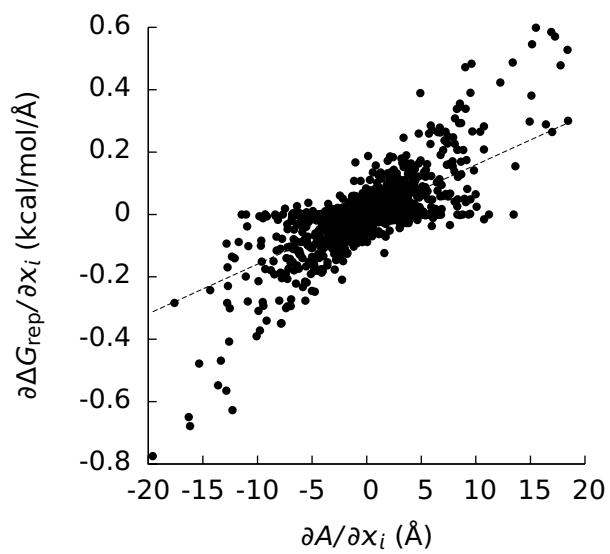

(a)

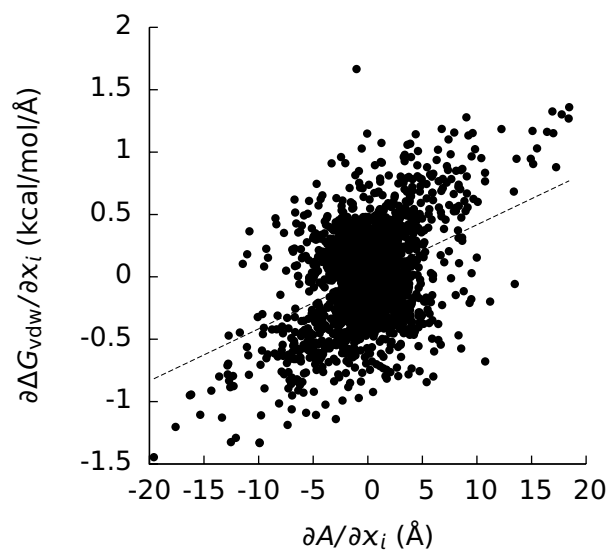

(b)

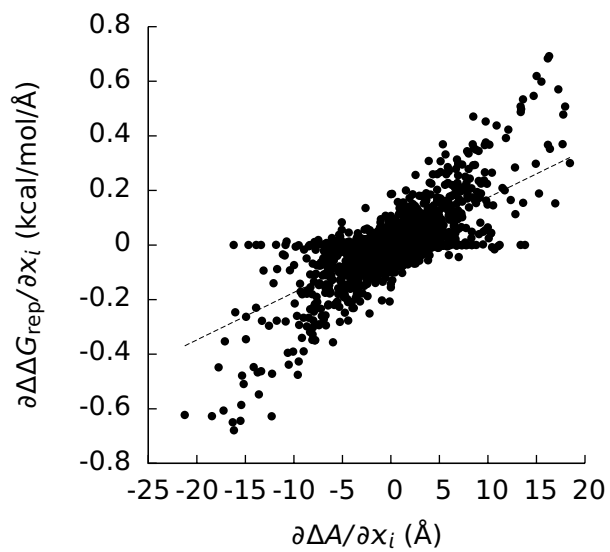

(c)

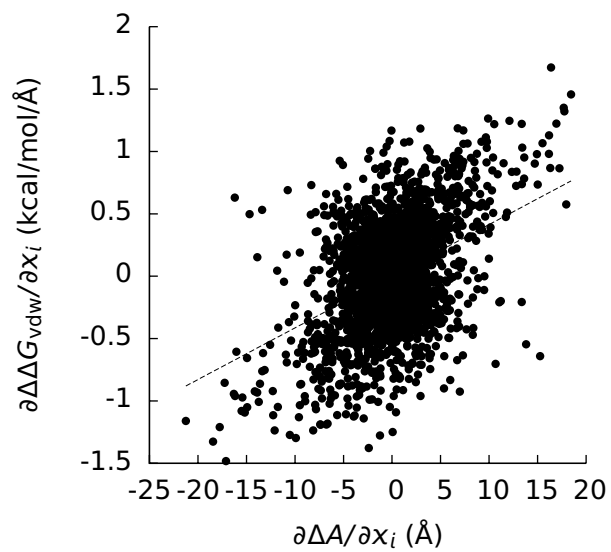

(d)

Figure 3: a) The derivative ( $\partial\Delta G_{\text{rep}}/\partial x_i$ ) of the repulsive component ( $\Delta G_{\text{rep}}$ ) of the Lennard-Jones cavity insertion free energy ( $\Delta G_{\text{vdw}}$ ) with respect to the coordinates ( $x_i$ ) of the atomic centers versus the derivative ( $\partial A/\partial x_i$ ) of the solvent-accessible area ( $A$ ) with respect to  $x_i$  for the 1ACB complex. b)  $\partial\Delta G_{\text{vdw}}/\partial x_i$  versus  $\partial A/\partial x_i$  for the 1ACB complex. c) The derivative ( $\partial\Delta\Delta G_{\text{rep}}/\partial x_i$ ) of the repulsive component ( $\Delta\Delta G_{\text{rep}}$ ) of the Lennard-Jones component ( $\Delta\Delta G_{\text{vdw}}$ ) of the binding free energy with respect to  $x_i$  versus the derivative ( $\partial\Delta A/\partial x_i$ ) of the change ( $\Delta A$ ) in  $A$  upon binding with respect to  $x_i$  for the 1ACB complex. d)  $\partial\Delta\Delta G_{\text{vdw}}/\partial x_i$  versus  $\partial\Delta A/\partial x_i$  for the 1ACB complex. The dotted lines are least-squares lines drawn through the data. The slopes and squares of the Pearson correlation coefficients of these lines can be found in Table 1 of the main text.

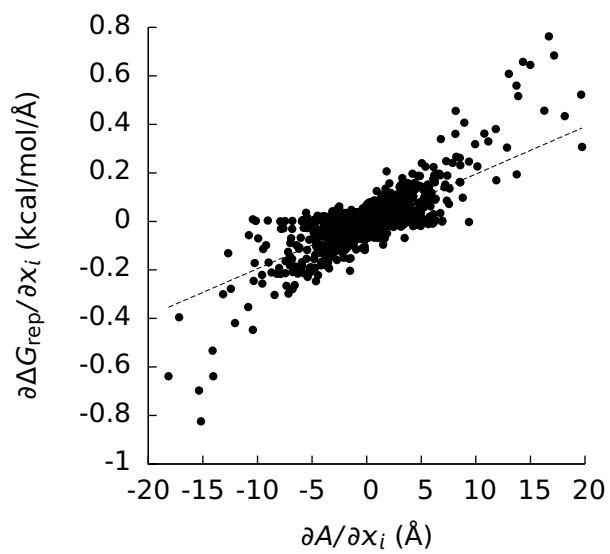

(a)

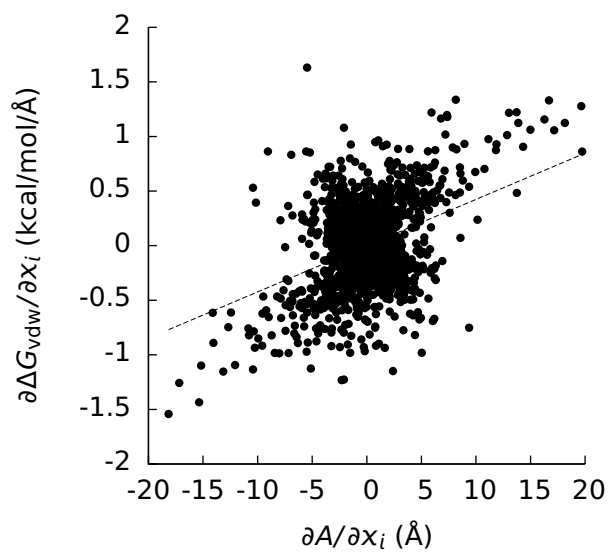

(b)

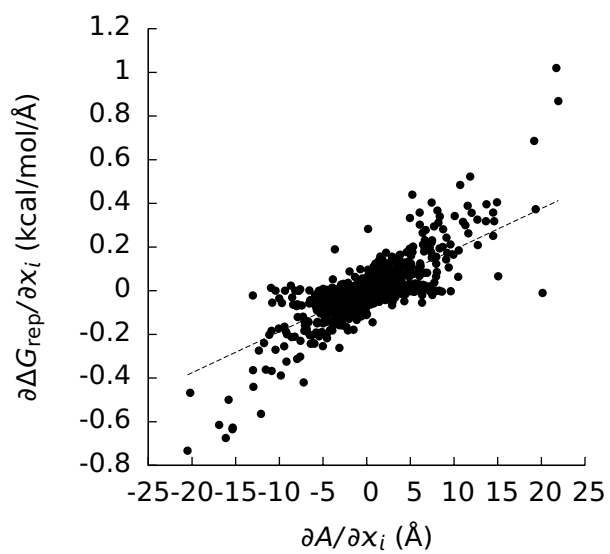

(c)

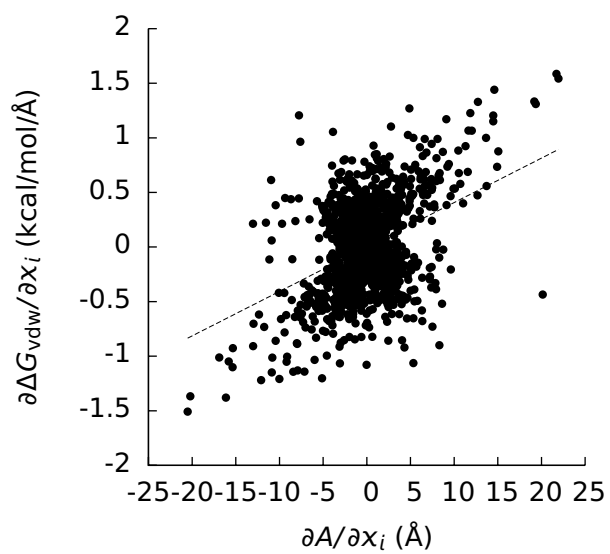

(d)

Figure 4: a) The derivative ( $\partial\Delta G_{\text{rep}}/\partial x_i$ ) of the repulsive component ( $\Delta G_{\text{rep}}$ ) of the Lennard-Jones cavity insertion free energy ( $\Delta G_{\text{vdw}}$ ) with respect to the coordinates ( $x_i$ ) of the atomic centers versus the derivative ( $\partial A/\partial x_i$ ) of the solvent-accessible area ( $A$ ) with respect to  $x_i$  for the first component of the 1AVX complex. b)  $\partial\Delta G_{\text{vdw}}/\partial x_i$  versus  $\partial A/\partial x_i$  for the first component of the 1AVX complex. c)  $\partial\Delta G_{\text{rep}}/\partial x_i$  versus  $\partial A/\partial x_i$  for the second component of the 1AVX complex. d)  $\partial\Delta G_{\text{vdw}}/\partial x_i$  versus  $\partial A/\partial x_i$  for the second component of the 1AVX complex. The dotted lines are least-squares lines drawn through the data. The slopes and squares of the Pearson correlation coefficients of these lines can be found in Table 1 of the main text.

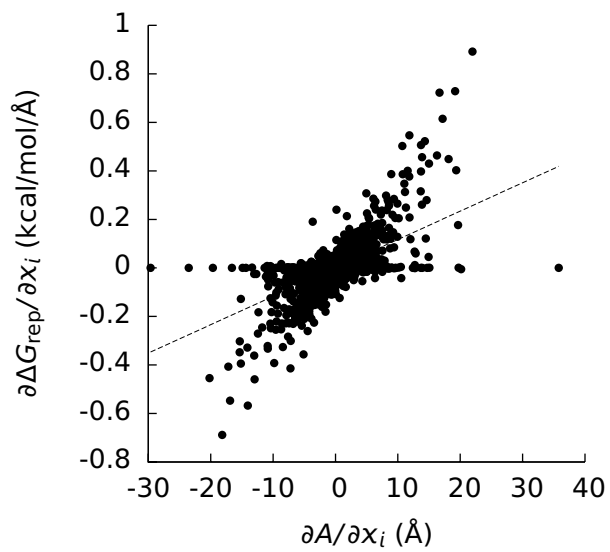

(a)

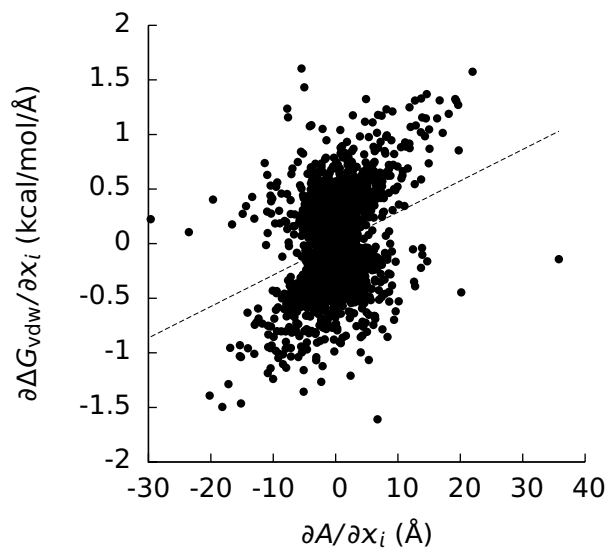

(b)

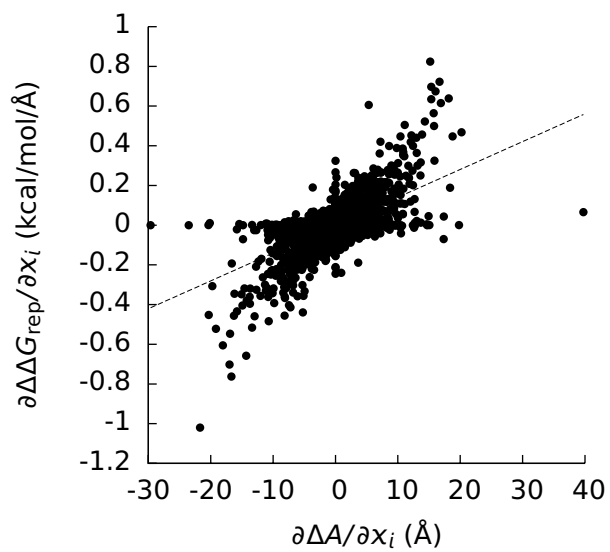

(c)

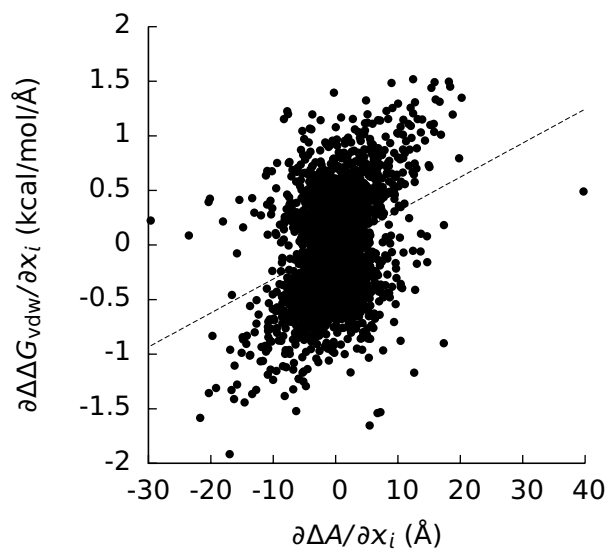

(d)



Figure 5: a) The derivative ( $\partial\Delta G_{\text{rep}}/\partial x_i$ ) of the repulsive component ( $\Delta G_{\text{rep}}$ ) of the Lennard-Jones cavity insertion free energy ( $\Delta G_{\text{vdw}}$ ) with respect to the coordinates ( $x_i$ ) of the atomic centers versus the derivative ( $\partial A/\partial x_i$ ) of the solvent-accessible area ( $A$ ) with respect to  $x_i$  for the 1AVX complex. b)  $\partial\Delta G_{\text{vdw}}/\partial x_i$  versus  $\partial A/\partial x_i$  for the 1AVX complex. c) The derivative ( $\partial\Delta\Delta G_{\text{rep}}/\partial x_i$ ) of the repulsive component ( $\Delta\Delta G_{\text{rep}}$ ) of the Lennard-Jones component ( $\Delta\Delta G_{\text{vdw}}$ ) of the binding free energy with respect to  $x_i$  versus the derivative ( $\partial\Delta A/\partial x_i$ ) of the change ( $\Delta A$ ) in  $A$  upon binding with respect to  $x_i$  for the 1AVX complex. d)  $\partial\Delta\Delta G_{\text{vdw}}/\partial x_i$  versus  $\partial\Delta A/\partial x_i$  for the 1AVX complex. The dotted lines are least-squares lines drawn through the data. The slopes and squares of the Pearson correlation coefficients of these lines can be found in Table 1 of the main text.

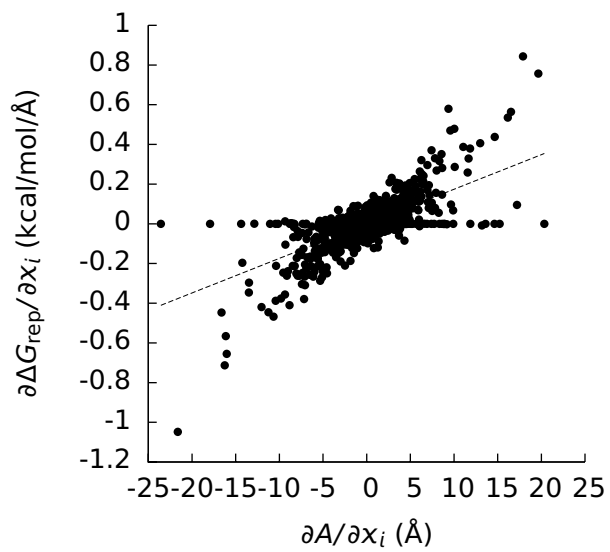

(a)

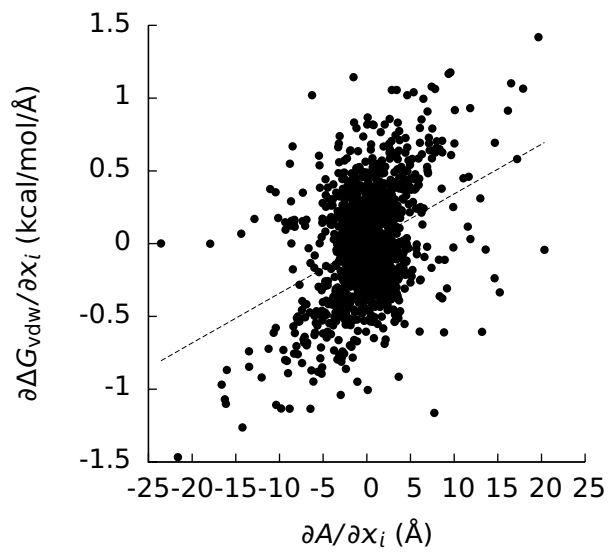

(b)

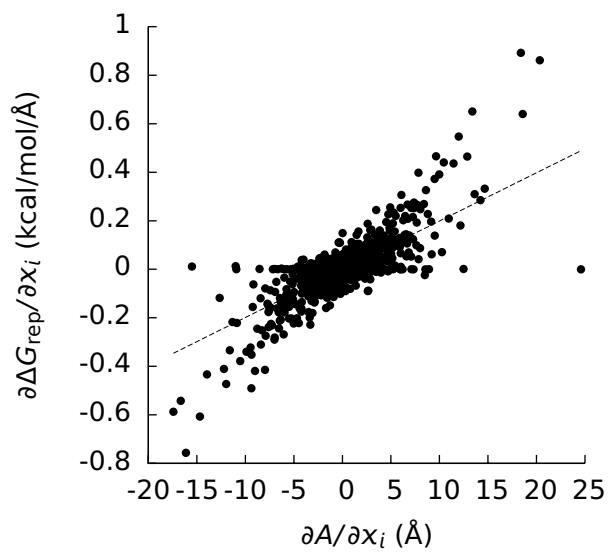

(c)

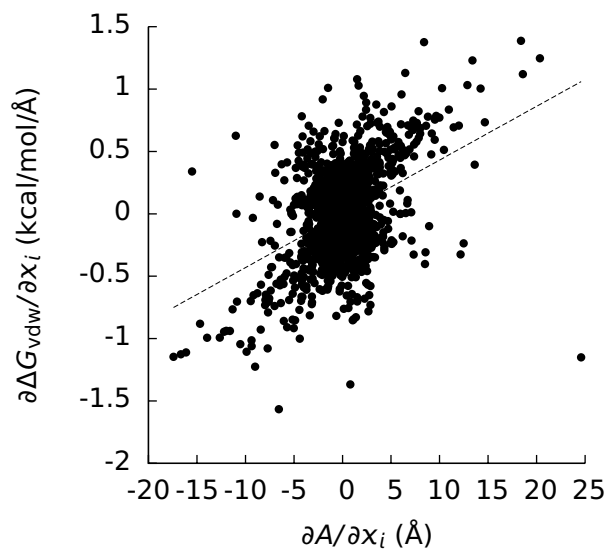

(d)

Figure 6: a) The derivative ( $\partial\Delta G_{\text{rep}}/\partial x_i$ ) of the repulsive component ( $\Delta G_{\text{rep}}$ ) of the Lennard-Jones cavity insertion free energy ( $\Delta G_{\text{vdw}}$ ) with respect to the coordinates ( $x_i$ ) of the atomic centers versus the derivative ( $\partial A/\partial x_i$ ) of the solvent-accessible area ( $A$ ) with respect to  $x_i$  for the first component of the 1BEB complex. b)  $\partial\Delta G_{\text{vdw}}/\partial x_i$  versus  $\partial A/\partial x_i$  for the first component of the 1BEB complex. c)  $\partial\Delta G_{\text{rep}}/\partial x_i$  versus  $\partial A/\partial x_i$  for the second component of the 1BEB complex. d)  $\partial\Delta G_{\text{vdw}}/\partial x_i$  versus  $\partial A/\partial x_i$  for the second component of the 1BEB complex. The dotted lines are least-squares lines drawn through the data. The slopes and squares of the Pearson correlation coefficients of these lines can be found in Table 1 of the main text.

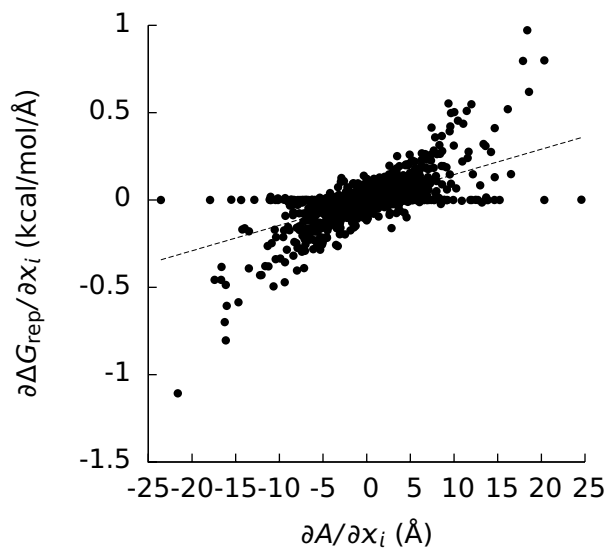

(a)

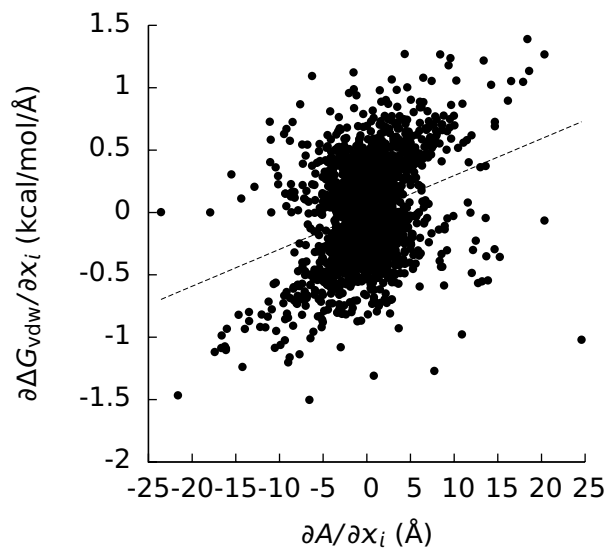

(b)

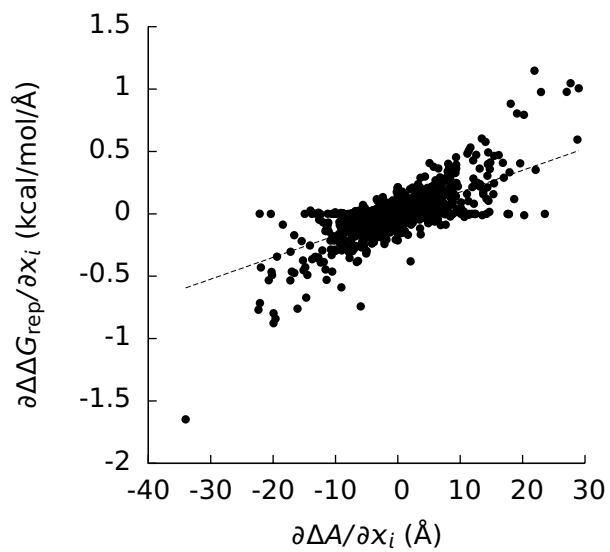

(c)

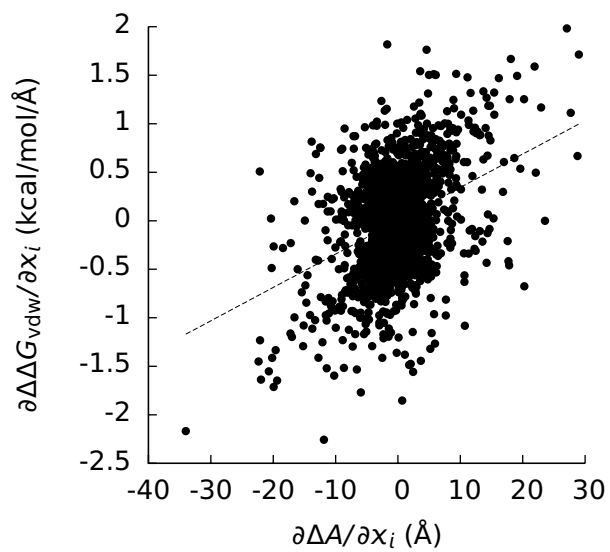

(d)

Figure 7: a) The derivative ( $\partial\Delta G_{\text{rep}}/\partial x_i$ ) of the repulsive component ( $\Delta G_{\text{rep}}$ ) of the Lennard-Jones cavity insertion free energy ( $\Delta G_{\text{vdw}}$ ) with respect to the coordinates ( $x_i$ ) of the atomic centers versus the derivative ( $\partial A/\partial x_i$ ) of the solvent-accessible area ( $A$ ) with respect to  $x_i$  for the 1BEB complex. b)  $\partial\Delta G_{\text{vdw}}/\partial x_i$  versus  $\partial A/\partial x_i$  for the 1BEB complex. c) The derivative ( $\partial\Delta\Delta G_{\text{rep}}/\partial x_i$ ) of the repulsive component ( $\Delta\Delta G_{\text{rep}}$ ) of the Lennard-Jones component ( $\Delta\Delta G_{\text{vdw}}$ ) of the binding free energy with respect to  $x_i$  versus the derivative ( $\partial\Delta A/\partial x_i$ ) of the change ( $\Delta A$ ) in  $A$  upon binding with respect to  $x_i$  for the 1BEB complex. d)  $\partial\Delta\Delta G_{\text{vdw}}/\partial x_i$  versus  $\partial\Delta A/\partial x_i$  for the 1BEB complex. The dotted lines are least-squares lines drawn through the data. The slopes and squares of the Pearson correlation coefficients of these lines can be found in Table 1 of the main text.

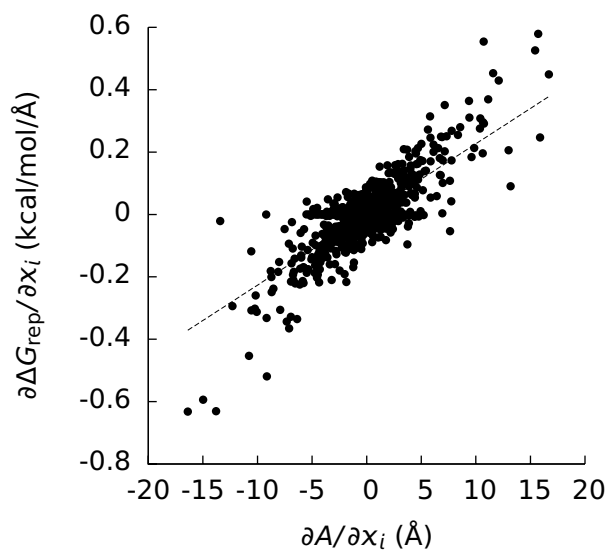

(a)

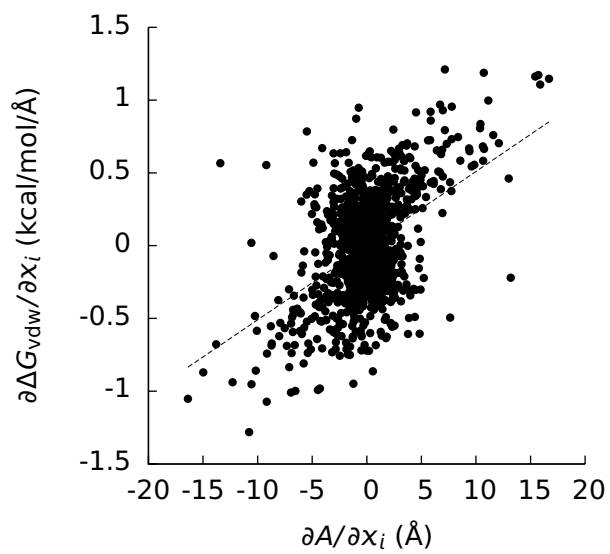

(b)

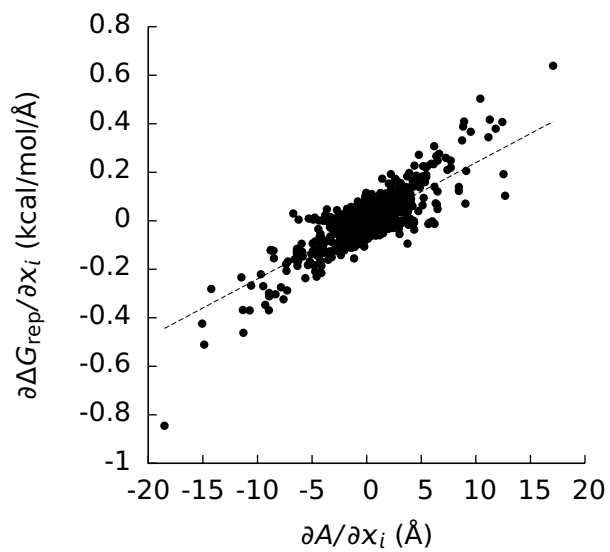

(c)

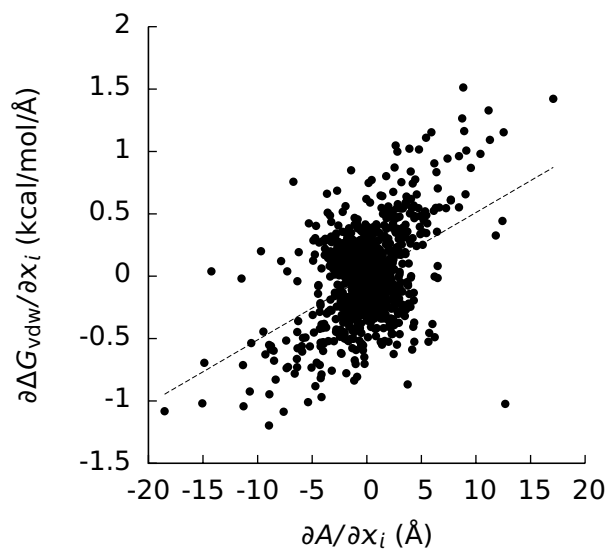

(d)

Figure 8: a) The derivative ( $\partial\Delta G_{\text{rep}}/\partial x_i$ ) of the repulsive component ( $\Delta G_{\text{rep}}$ ) of the Lennard-Jones cavity insertion free energy ( $\Delta G_{\text{vdw}}$ ) with respect to the coordinates ( $x_i$ ) of the atomic centers versus the derivative ( $\partial A/\partial x_i$ ) of the solvent-accessible area ( $A$ ) with respect to  $x_i$  for the first component of the 1BRS complex. b)  $\partial\Delta G_{\text{vdw}}/\partial x_i$  versus  $\partial A/\partial x_i$  for the first component of the 1BRS complex. c)  $\partial\Delta G_{\text{rep}}/\partial x_i$  versus  $\partial A/\partial x_i$  for the second component of the 1BRS complex. d)  $\partial\Delta G_{\text{vdw}}/\partial x_i$  versus  $\partial A/\partial x_i$  for the second component of the 1BRS complex. The dotted lines are least-squares lines drawn through the data. The slopes and squares of the Pearson correlation coefficients of these lines can be found in Table 1 of the main text.

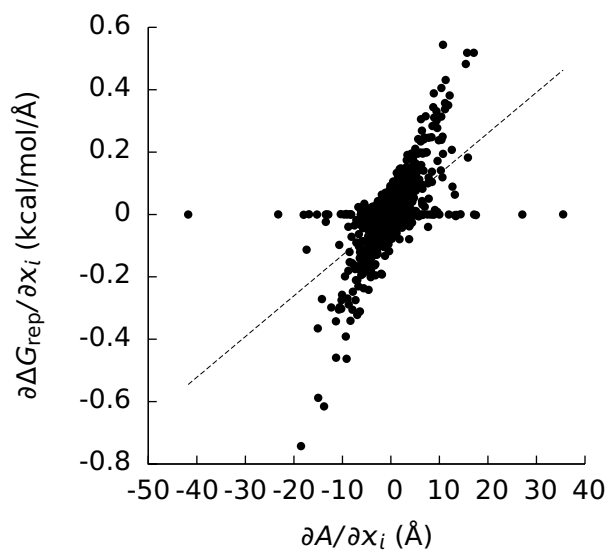

(a)

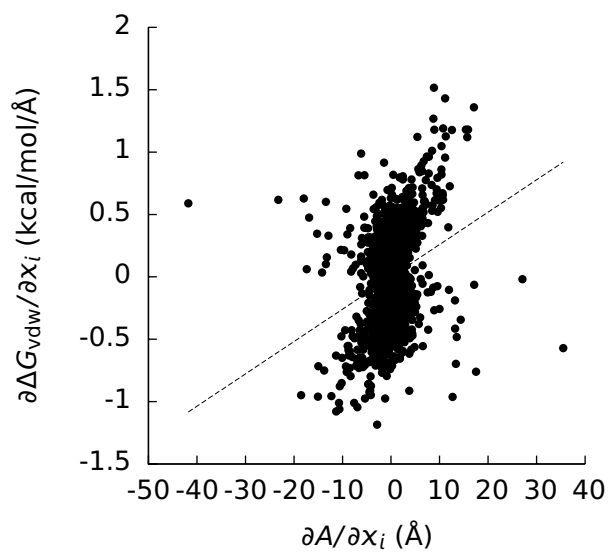

(b)

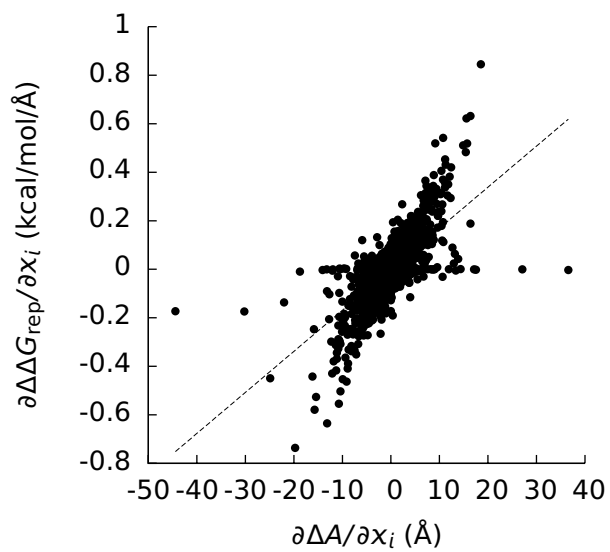

(c)

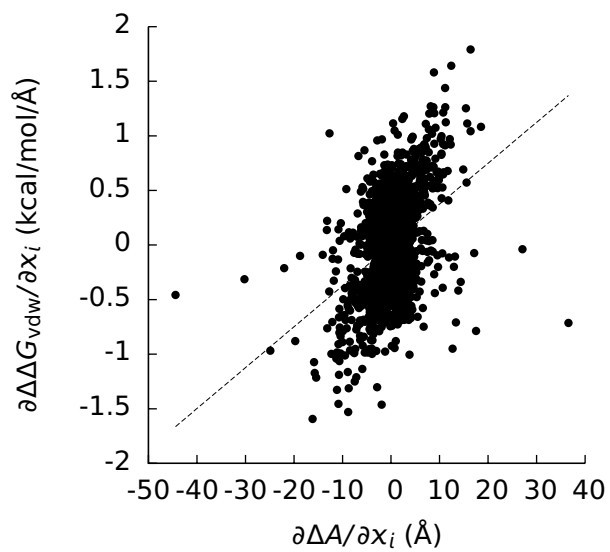

(d)



Figure 9: a) The derivative ( $\partial\Delta G_{\text{rep}}/\partial x_i$ ) of the repulsive component ( $\Delta G_{\text{rep}}$ ) of the Lennard-Jones cavity insertion free energy ( $\Delta G_{\text{vdw}}$ ) with respect to the coordinates ( $x_i$ ) of the atomic centers versus the derivative ( $\partial A/\partial x_i$ ) of the solvent-accessible area ( $A$ ) with respect to  $x_i$  for the 1BRS complex. b)  $\partial\Delta G_{\text{vdw}}/\partial x_i$  versus  $\partial A/\partial x_i$  for the 1BRS complex. c) The derivative ( $\partial\Delta\Delta G_{\text{rep}}/\partial x_i$ ) of the repulsive component ( $\Delta\Delta G_{\text{rep}}$ ) of the Lennard-Jones component ( $\Delta\Delta G_{\text{vdw}}$ ) of the binding free energy with respect to  $x_i$  versus the derivative ( $\partial\Delta A/\partial x_i$ ) of the change ( $\Delta A$ ) in  $A$  upon binding with respect to  $x_i$  for the 1BRS complex. d)  $\partial\Delta\Delta G_{\text{vdw}}/\partial x_i$  versus  $\partial\Delta A/\partial x_i$  for the 1BRS complex. The dotted lines are least-squares lines drawn through the data. The slopes and squares of the Pearson correlation coefficients of these lines can be found in Table 1 of the main text.

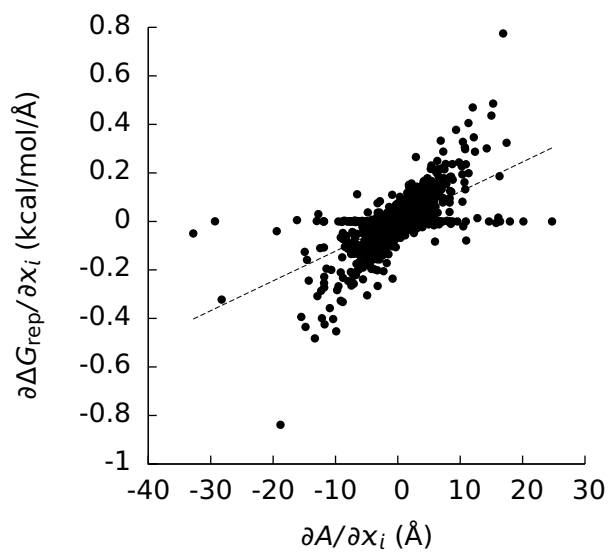

(a)

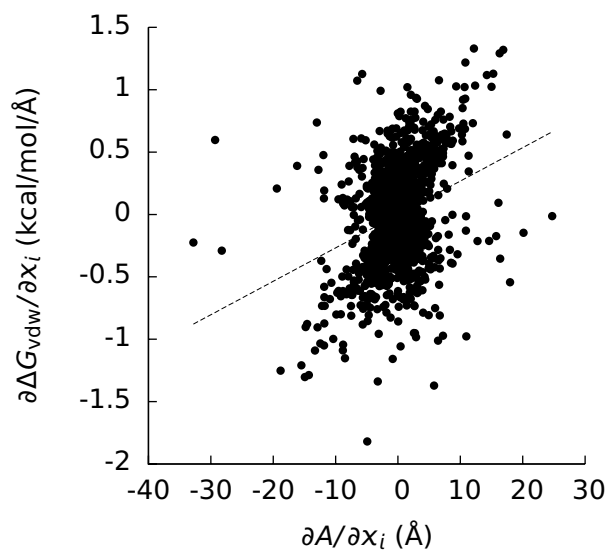

(b)

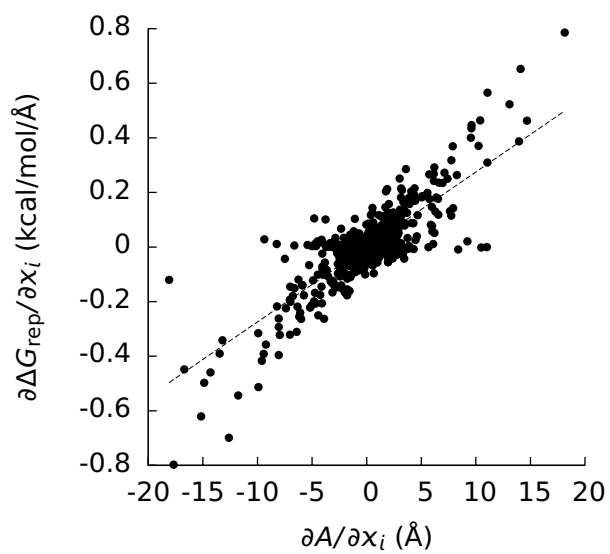

(c)

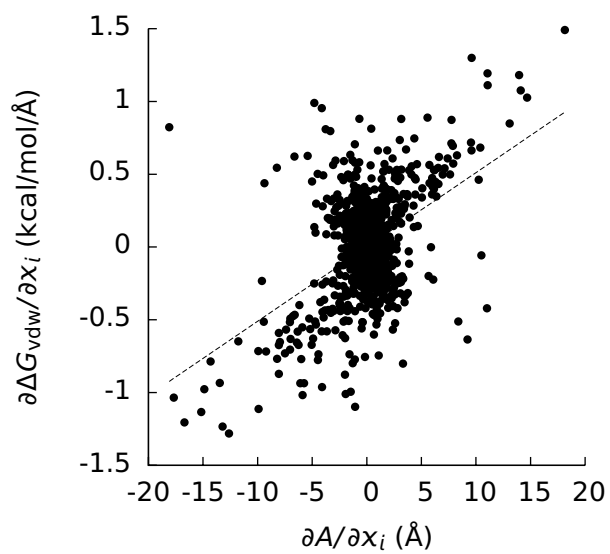

(d)

Figure 10: a) The derivative ( $\partial\Delta G_{\text{rep}}/\partial x_i$ ) of the repulsive component ( $\Delta G_{\text{rep}}$ ) of the Lennard-Jones cavity insertion free energy ( $\Delta G_{\text{vdw}}$ ) with respect to the coordinates ( $x_i$ ) of the atomic centers versus the derivative ( $\partial A/\partial x_i$ ) of the solvent-accessible area ( $A$ ) with respect to  $x_i$  for the first component of the 1EAW complex. b)  $\partial\Delta G_{\text{vdw}}/\partial x_i$  versus  $\partial A/\partial x_i$  for the first component of the 1EAW complex. c)  $\partial\Delta G_{\text{rep}}/\partial x_i$  versus  $\partial A/\partial x_i$  for the second component of the 1EAW complex. d)  $\partial\Delta G_{\text{vdw}}/\partial x_i$  versus  $\partial A/\partial x_i$  for the second component of the 1EAW complex. The dotted lines are least-squares lines drawn through the data. The slopes and squares of the Pearson correlation coefficients of these lines can be found in Table 1 of the main text.

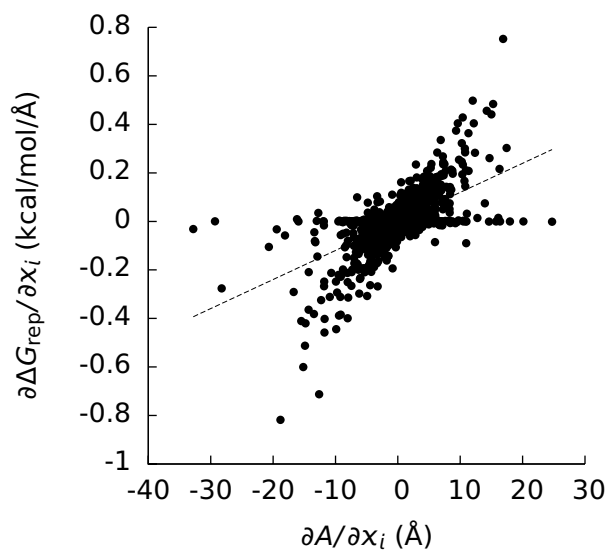

(a)

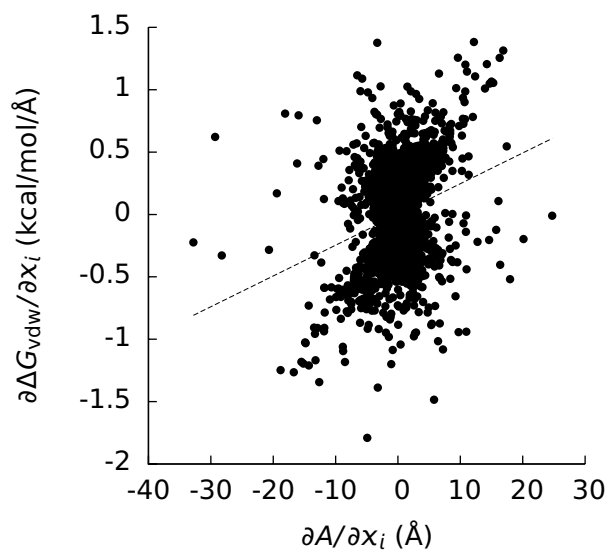

(b)

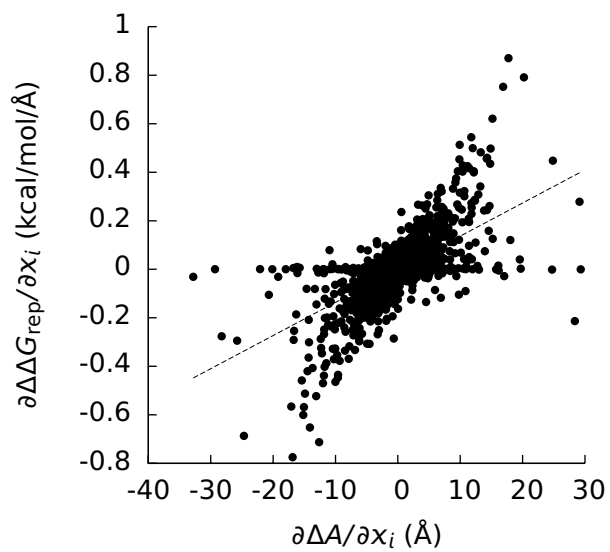

(c)

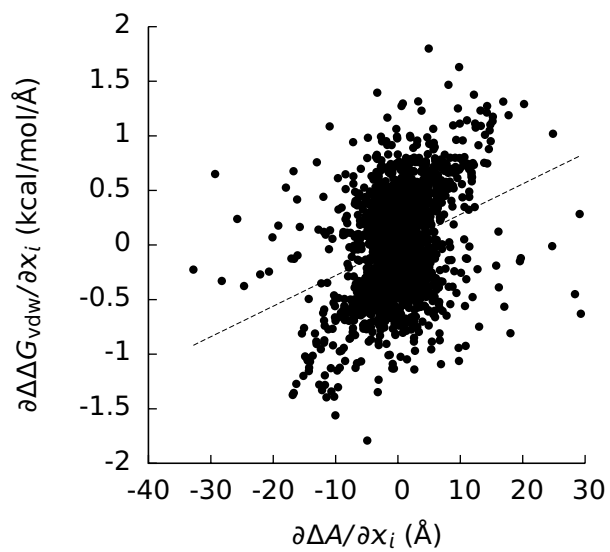

(d)

Figure 11: a) The derivative ( $\partial\Delta G_{\text{rep}}/\partial x_i$ ) of the repulsive component ( $\Delta G_{\text{rep}}$ ) of the Lennard-Jones cavity insertion free energy ( $\Delta G_{\text{vdw}}$ ) with respect to the coordinates ( $x_i$ ) of the atomic centers versus the derivative ( $\partial A/\partial x_i$ ) of the solvent-accessible area ( $A$ ) with respect to  $x_i$  for the 1EAW complex. b)  $\partial\Delta G_{\text{vdw}}/\partial x_i$  versus  $\partial A/\partial x_i$  for the 1EAW complex. c) The derivative ( $\partial\Delta\Delta G_{\text{rep}}/\partial x_i$ ) of the repulsive component ( $\Delta\Delta G_{\text{rep}}$ ) of the Lennard-Jones component ( $\Delta\Delta G_{\text{vdw}}$ ) of the binding free energy with respect to  $x_i$  versus the derivative ( $\partial\Delta A/\partial x_i$ ) of the change ( $\Delta A$ ) in  $A$  upon binding with respect to  $x_i$  for the 1EAW complex. d)  $\partial\Delta\Delta G_{\text{vdw}}/\partial x_i$  versus  $\partial\Delta A/\partial x_i$  for the 1EAW complex. The dotted lines are least-squares lines drawn through the data. The slopes and squares of the Pearson correlation coefficients of these lines can be found in Table 1 of the main text.

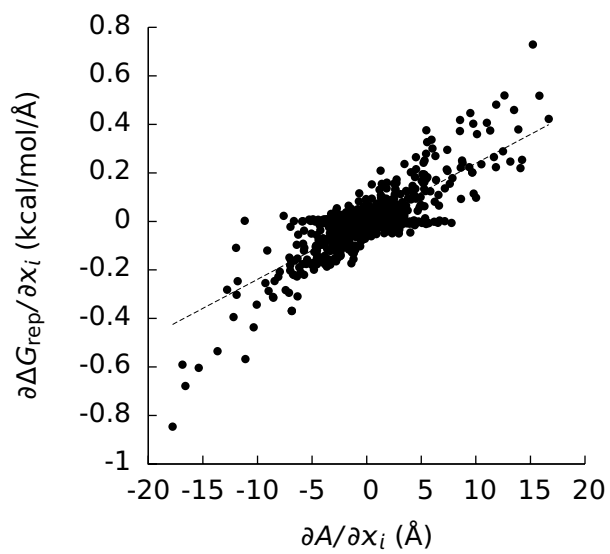

(a)

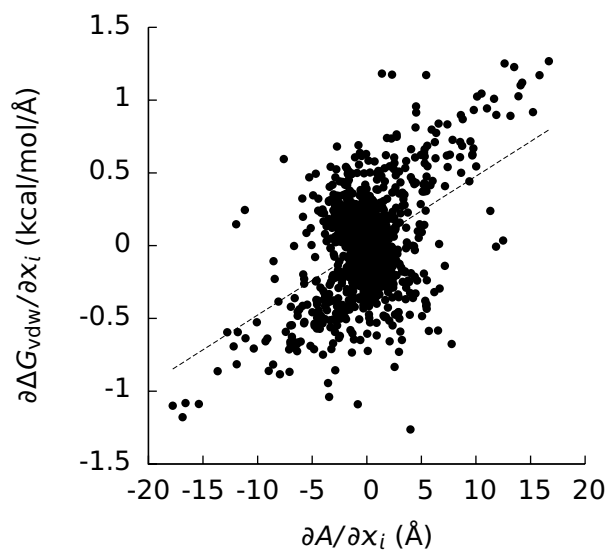

(b)

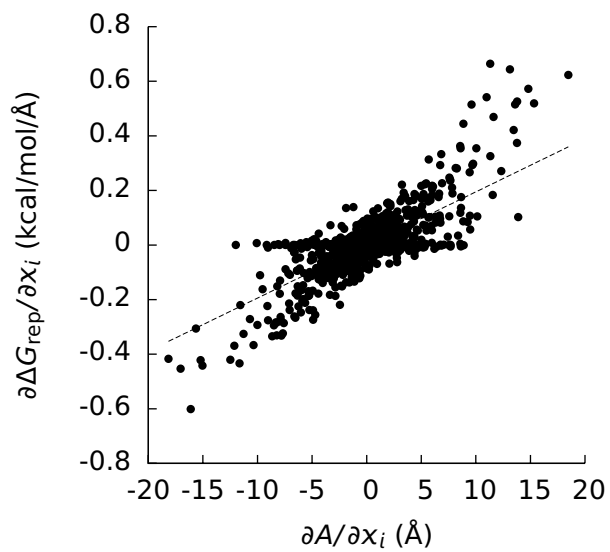

(c)

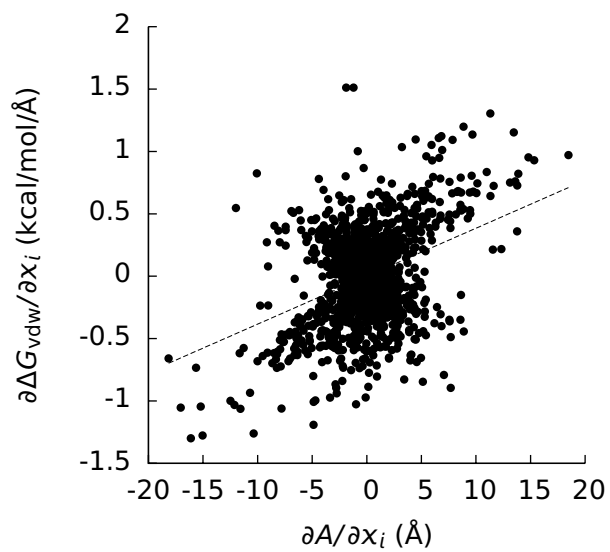

(d)

Figure 12: a) The derivative ( $\partial\Delta G_{\text{rep}}/\partial x_i$ ) of the repulsive component ( $\Delta G_{\text{rep}}$ ) of the Lennard-Jones cavity insertion free energy ( $\Delta G_{\text{vdw}}$ ) with respect to the coordinates ( $x_i$ ) of the atomic centers versus the derivative ( $\partial A/\partial x_i$ ) of the solvent-accessible area ( $A$ ) with respect to  $x_i$  for the first component of the 1EMV complex. b)  $\partial\Delta G_{\text{vdw}}/\partial x_i$  versus  $\partial A/\partial x_i$  for the first component of the 1EMV complex. c)  $\partial\Delta G_{\text{rep}}/\partial x_i$  versus  $\partial A/\partial x_i$  for the second component of the 1EMV complex. d)  $\partial\Delta G_{\text{vdw}}/\partial x_i$  versus  $\partial A/\partial x_i$  for the second component of the 1EMV complex. The dotted lines are least-squares lines drawn through the data. The slopes and squares of the Pearson correlation coefficients of these lines can be found in Table 1 of the main text.

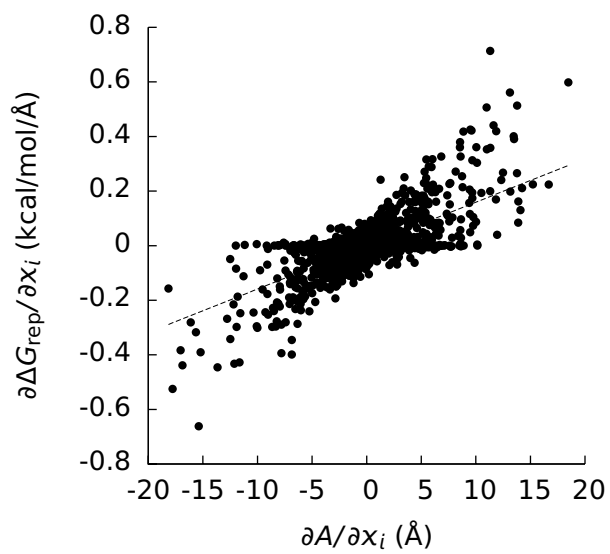

(a)

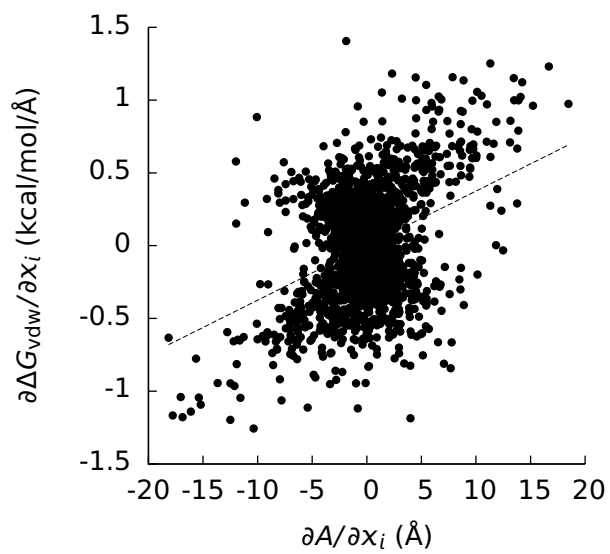

(b)

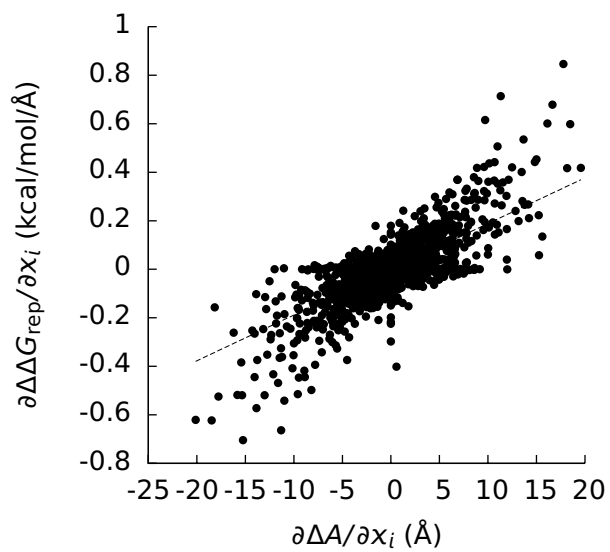

(c)

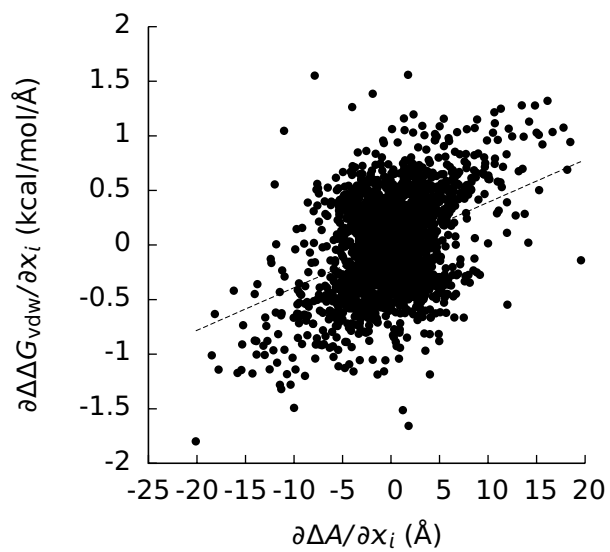

(d)



Figure 13: a) The derivative ( $\partial\Delta G_{\text{rep}}/\partial x_i$ ) of the repulsive component ( $\Delta G_{\text{rep}}$ ) of the Lennard-Jones cavity insertion free energy ( $\Delta G_{\text{vdw}}$ ) with respect to the coordinates ( $x_i$ ) of the atomic centers versus the derivative ( $\partial A/\partial x_i$ ) of the solvent-accessible area ( $A$ ) with respect to  $x_i$  for the 1EMV complex. b)  $\partial\Delta G_{\text{vdw}}/\partial x_i$  versus  $\partial A/\partial x_i$  for the 1EMV complex. c) The derivative ( $\partial\Delta\Delta G_{\text{rep}}/\partial x_i$ ) of the repulsive component ( $\Delta\Delta G_{\text{rep}}$ ) of the Lennard-Jones component ( $\Delta\Delta G_{\text{vdw}}$ ) of the binding free energy with respect to  $x_i$  versus the derivative ( $\partial\Delta A/\partial x_i$ ) of the change ( $\Delta A$ ) in  $A$  upon binding with respect to  $x_i$  for the 1EMV complex. d)  $\partial\Delta\Delta G_{\text{vdw}}/\partial x_i$  versus  $\partial\Delta A/\partial x_i$  for the 1EMV complex. The dotted lines are least-squares lines drawn through the data. The slopes and squares of the Pearson correlation coefficients of these lines can be found in Table 1 of the main text.

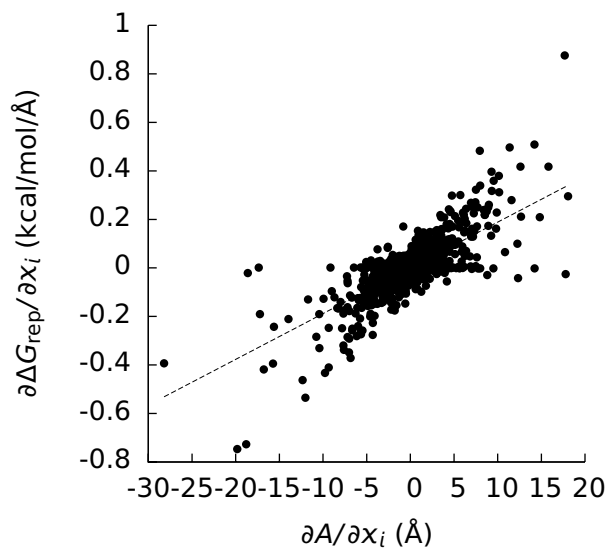

(a)

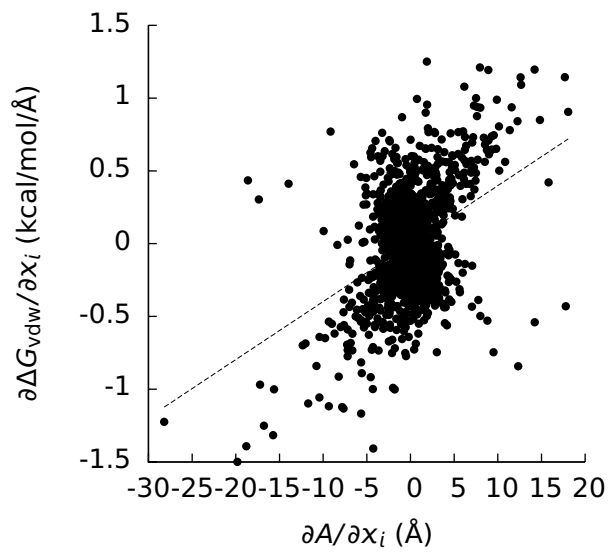

(b)

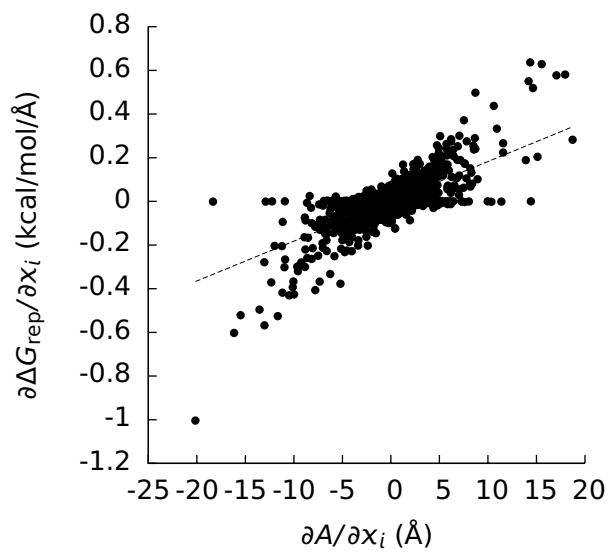

(c)

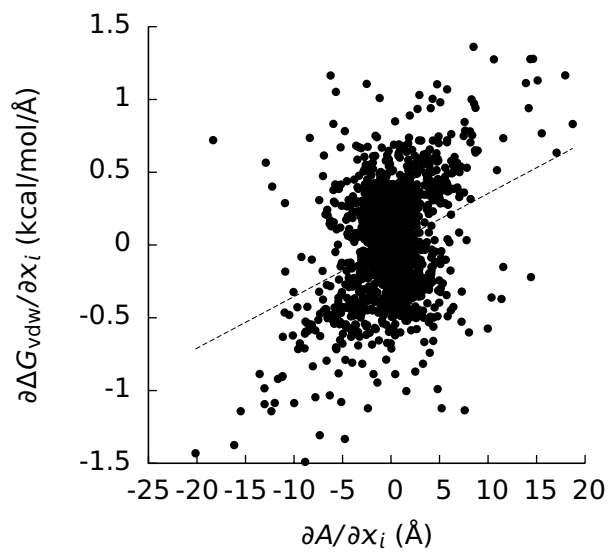

(d)

Figure 14: a) The derivative ( $\partial\Delta G_{\text{rep}}/\partial x_i$ ) of the repulsive component ( $\Delta G_{\text{rep}}$ ) of the Lennard-Jones cavity insertion free energy ( $\Delta G_{\text{vdw}}$ ) with respect to the coordinates ( $x_i$ ) of the atomic centers versus the derivative ( $\partial A/\partial x_i$ ) of the solvent-accessible area ( $A$ ) with respect to  $x_i$  for the first component of the 1HE1 complex. b)  $\partial\Delta G_{\text{vdw}}/\partial x_i$  versus  $\partial A/\partial x_i$  for the first component of the 1HE1 complex. c)  $\partial\Delta G_{\text{rep}}/\partial x_i$  versus  $\partial A/\partial x_i$  for the second component of the 1HE1 complex. d)  $\partial\Delta G_{\text{vdw}}/\partial x_i$  versus  $\partial A/\partial x_i$  for the second component of the 1HE1 complex. The dotted lines are least-squares lines drawn through the data. The slopes and squares of the Pearson correlation coefficients of these lines can be found in Table 1 of the main text.

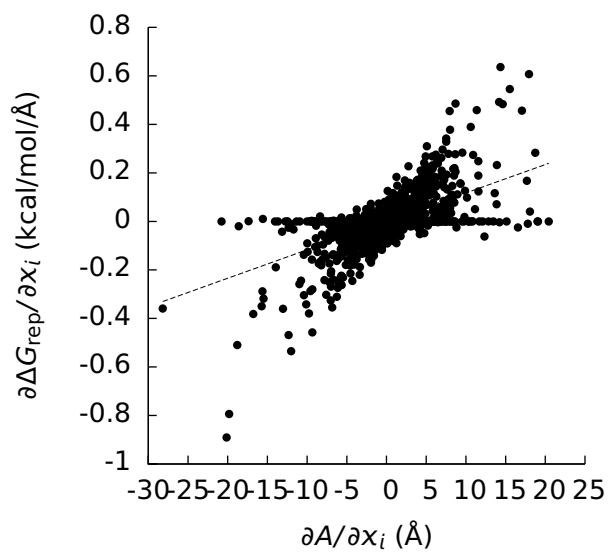

(a)

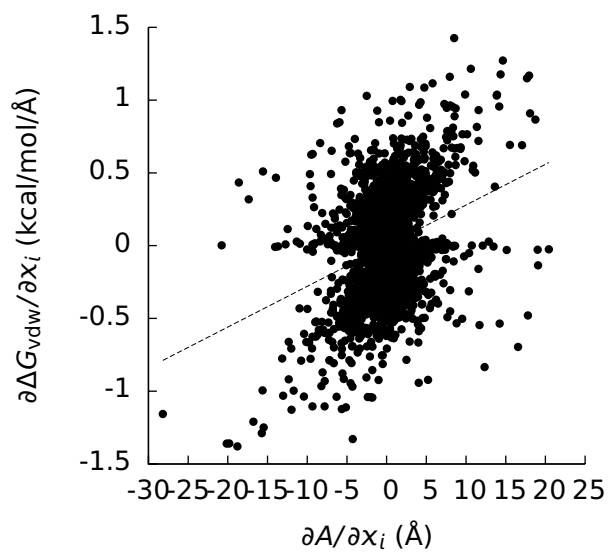

(b)

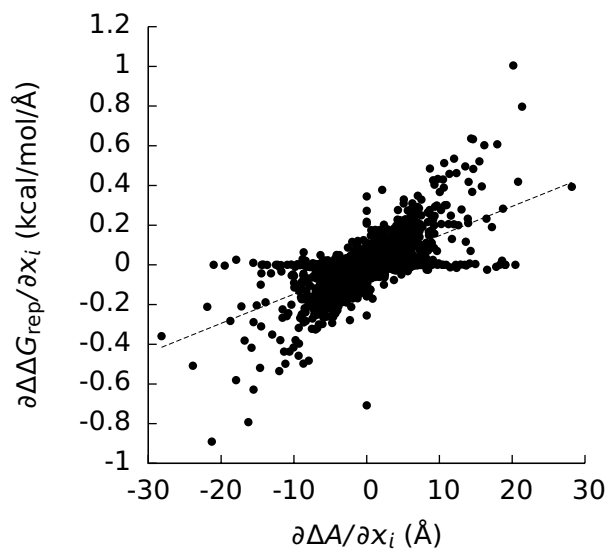

(c)

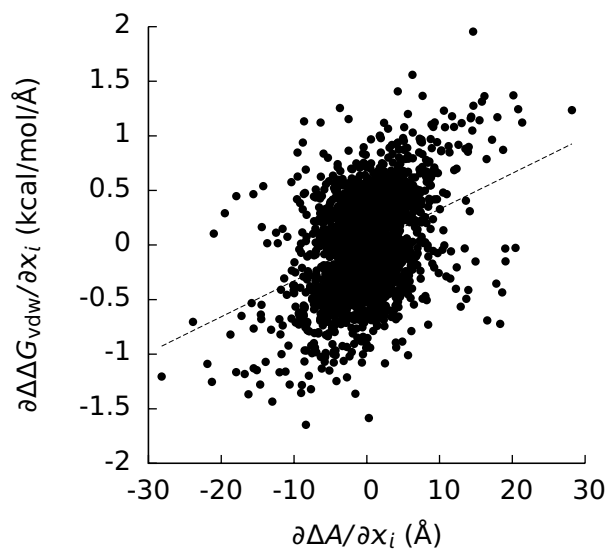

(d)

Figure 15: a) The derivative ( $\partial\Delta G_{\text{rep}}/\partial x_i$ ) of the repulsive component ( $\Delta G_{\text{rep}}$ ) of the Lennard-Jones cavity insertion free energy ( $\Delta G_{\text{vdw}}$ ) with respect to the coordinates ( $x_i$ ) of the atomic centers versus the derivative ( $\partial A/\partial x_i$ ) of the solvent-accessible area ( $A$ ) with respect to  $x_i$  for the 1HE1 complex. b)  $\partial\Delta G_{\text{vdw}}/\partial x_i$  versus  $\partial A/\partial x_i$  for the 1HE1 complex. c) The derivative ( $\partial\Delta\Delta G_{\text{rep}}/\partial x_i$ ) of the repulsive component ( $\Delta\Delta G_{\text{rep}}$ ) of the Lennard-Jones component ( $\Delta\Delta G_{\text{vdw}}$ ) of the binding free energy with respect to  $x_i$  versus the derivative ( $\partial\Delta A/\partial x_i$ ) of the change ( $\Delta A$ ) in  $A$  upon binding with respect to  $x_i$  for the 1HE1 complex. d)  $\partial\Delta\Delta G_{\text{vdw}}/\partial x_i$  versus  $\partial\Delta A/\partial x_i$  for the 1HE1 complex. The dotted lines are least-squares lines drawn through the data. The slopes and squares of the Pearson correlation coefficients of these lines can be found in Table 1 of the main text.

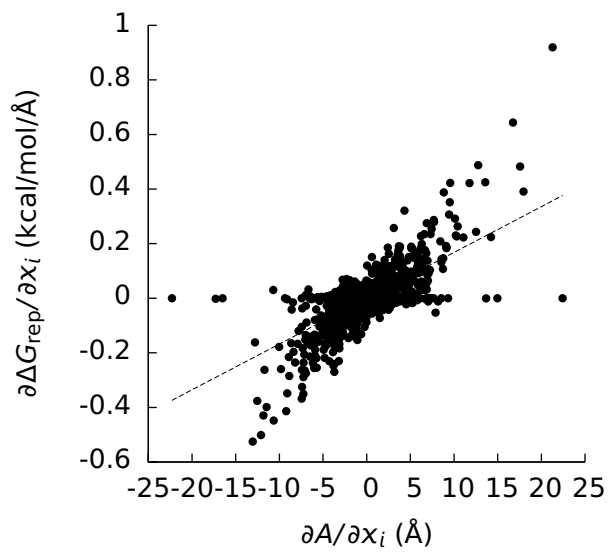

(a)

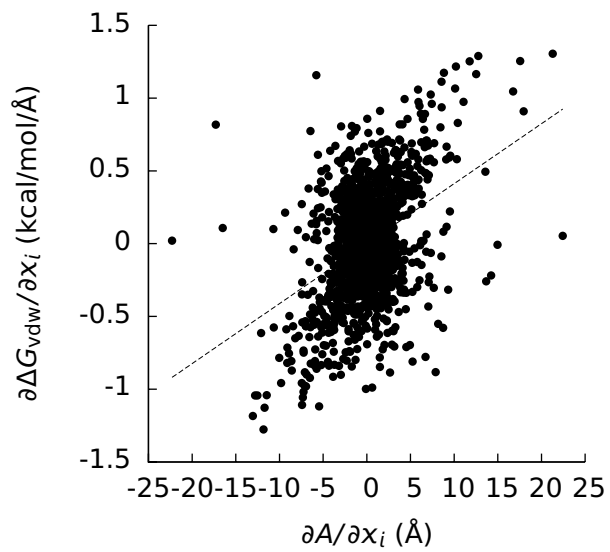

(b)

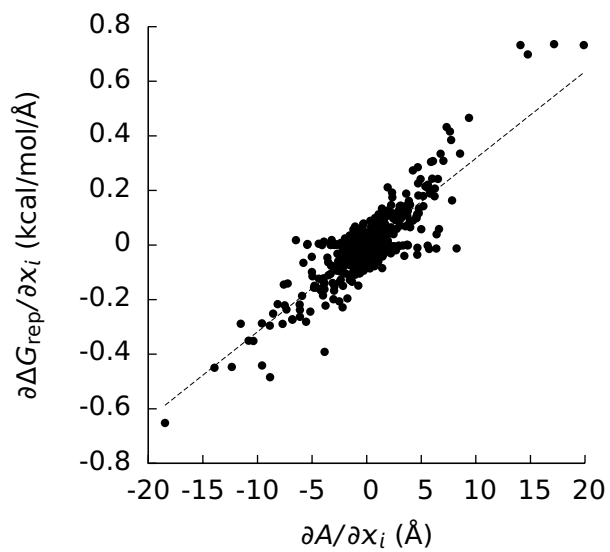

(c)

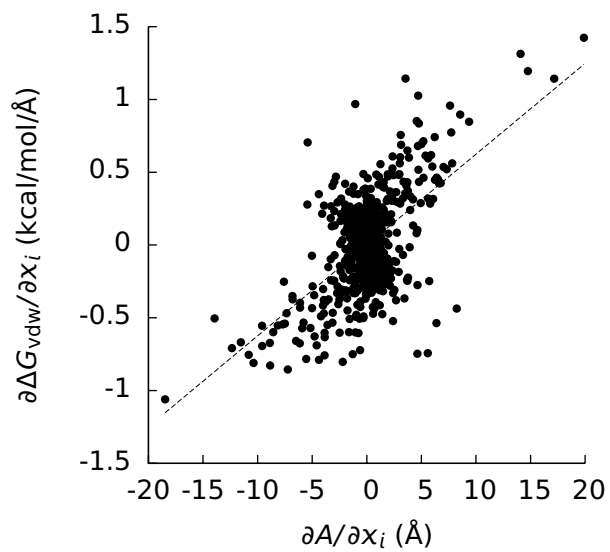

(d)

Figure 16: a) The derivative ( $\partial\Delta G_{\text{rep}}/\partial x_i$ ) of the repulsive component ( $\Delta G_{\text{rep}}$ ) of the Lennard-Jones cavity insertion free energy ( $\Delta G_{\text{vdw}}$ ) with respect to the coordinates ( $x_i$ ) of the atomic centers versus the derivative ( $\partial A/\partial x_i$ ) of the solvent-accessible area ( $A$ ) with respect to  $x_i$  for the first component of the 1PPE complex. b)  $\partial\Delta G_{\text{vdw}}/\partial x_i$  versus  $\partial A/\partial x_i$  for the first component of the 1PPE complex. c)  $\partial\Delta G_{\text{rep}}/\partial x_i$  versus  $\partial A/\partial x_i$  for the second component of the 1PPE complex. d)  $\partial\Delta G_{\text{vdw}}/\partial x_i$  versus  $\partial A/\partial x_i$  for the second component of the 1PPE complex. The dotted lines are least-squares lines drawn through the data. The slopes and squares of the Pearson correlation coefficients of these lines can be found in Table 1 of the main text.

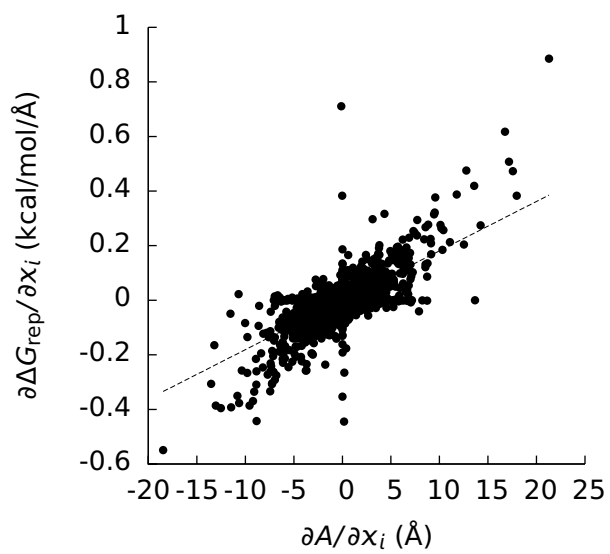

(a)

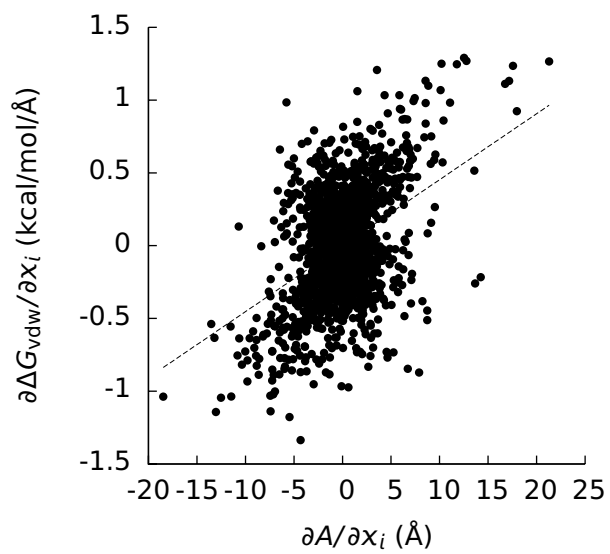

(b)

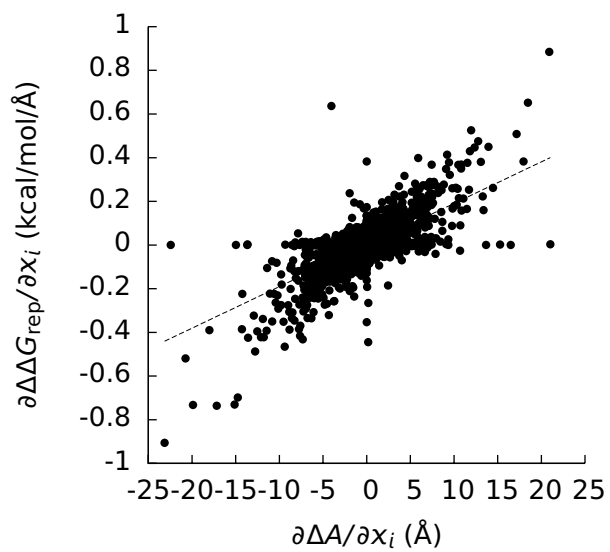

(c)

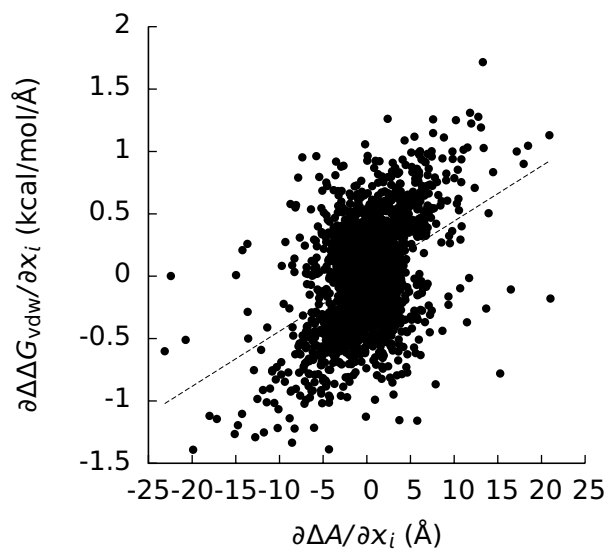

(d)



Figure 17: a) The derivative ( $\partial\Delta G_{\text{rep}}/\partial x_i$ ) of the repulsive component ( $\Delta G_{\text{rep}}$ ) of the Lennard-Jones cavity insertion free energy ( $\Delta G_{\text{vdw}}$ ) with respect to the coordinates ( $x_i$ ) of the atomic centers versus the derivative ( $\partial A/\partial x_i$ ) of the solvent-accessible area ( $A$ ) with respect to  $x_i$  for the 1PPE complex. b)  $\partial\Delta G_{\text{vdw}}/\partial x_i$  versus  $\partial A/\partial x_i$  for the 1PPE complex. c) The derivative ( $\partial\Delta\Delta G_{\text{rep}}/\partial x_i$ ) of the repulsive component ( $\Delta\Delta G_{\text{rep}}$ ) of the Lennard-Jones component ( $\Delta\Delta G_{\text{vdw}}$ ) of the binding free energy with respect to  $x_i$  versus the derivative ( $\partial\Delta A/\partial x_i$ ) of the change ( $\Delta A$ ) in  $A$  upon binding with respect to  $x_i$  for the 1PPE complex. d)  $\partial\Delta\Delta G_{\text{vdw}}/\partial x_i$  versus  $\partial\Delta A/\partial x_i$  for the 1PPE complex. The dotted lines are least-squares lines drawn through the data. The slopes and squares of the Pearson correlation coefficients of these lines can be found in Table 1 of the main text.

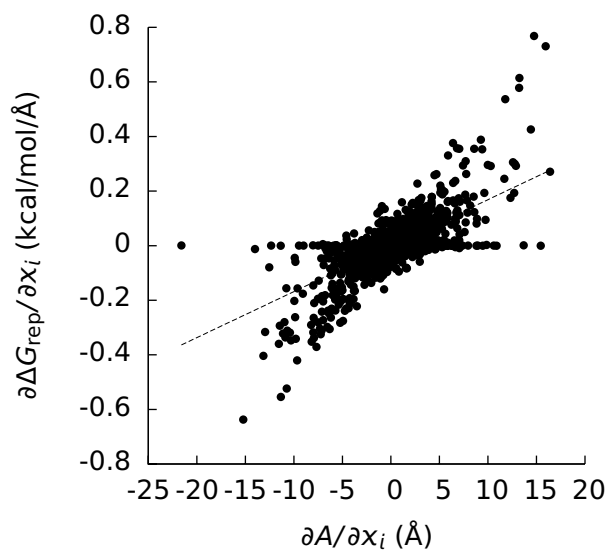

(a)

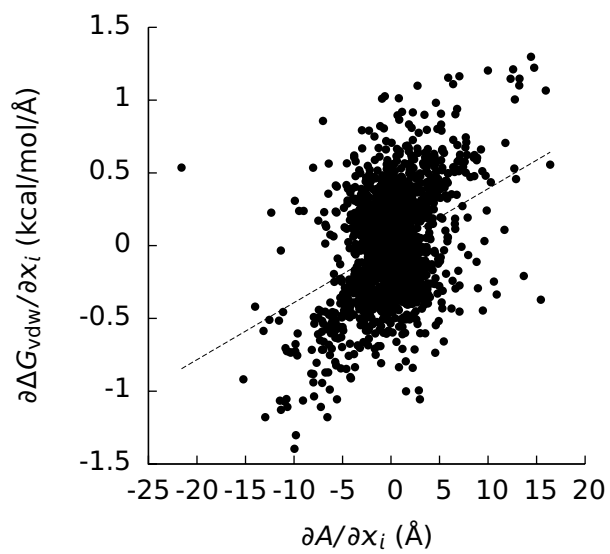

(b)

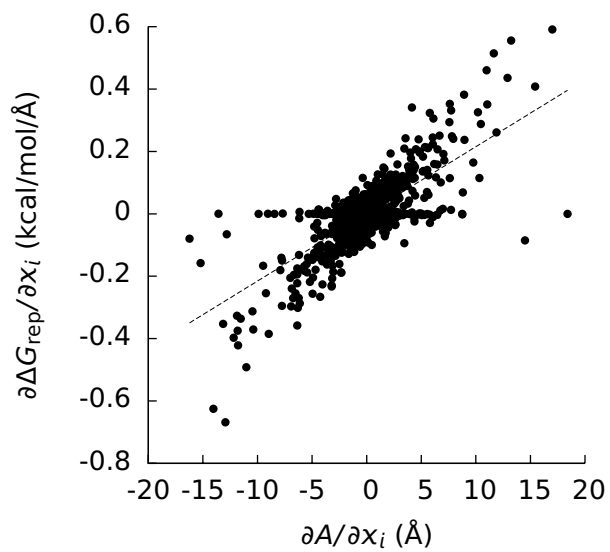

(c)

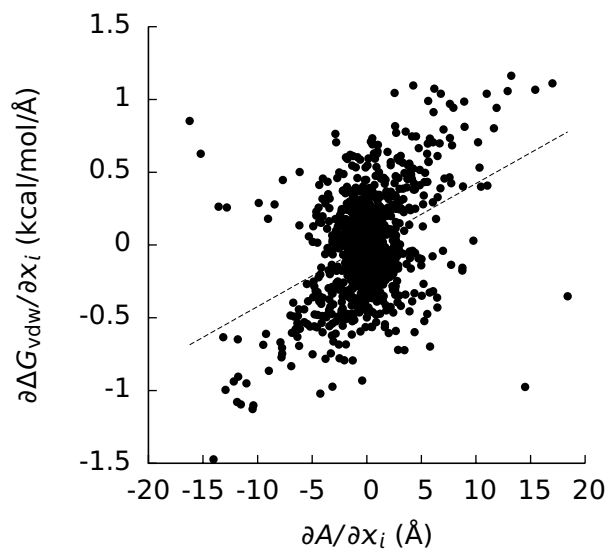

(d)

Figure 18: a) The derivative ( $\partial\Delta G_{\text{rep}}/\partial x_i$ ) of the repulsive component ( $\Delta G_{\text{rep}}$ ) of the Lennard-Jones cavity insertion free energy ( $\Delta G_{\text{vdw}}$ ) with respect to the coordinates ( $x_i$ ) of the atomic centers versus the derivative ( $\partial A/\partial x_i$ ) of the solvent-accessible area ( $A$ ) with respect to  $x_i$  for the first component of the 1UDI complex. b)  $\partial\Delta G_{\text{vdw}}/\partial x_i$  versus  $\partial A/\partial x_i$  for the first component of the 1UDI complex. c)  $\partial\Delta G_{\text{rep}}/\partial x_i$  versus  $\partial A/\partial x_i$  for the second component of the 1UDI complex. d)  $\partial\Delta G_{\text{vdw}}/\partial x_i$  versus  $\partial A/\partial x_i$  for the second component of the 1UDI complex. The dotted lines are least-squares lines drawn through the data. The slopes and squares of the Pearson correlation coefficients of these lines can be found in Table 1 of the main text.

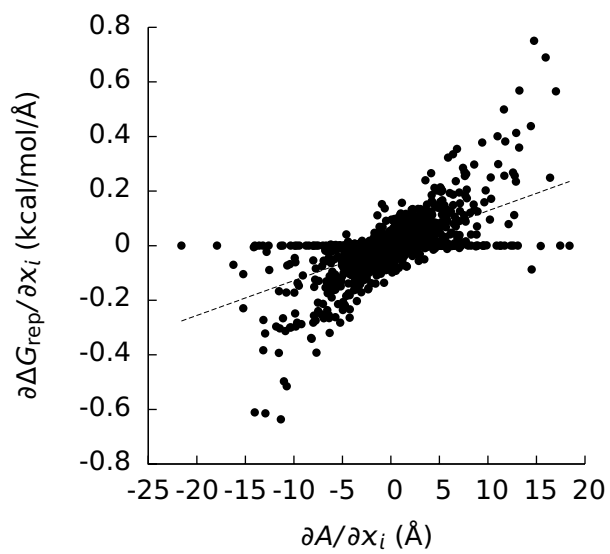

(a)

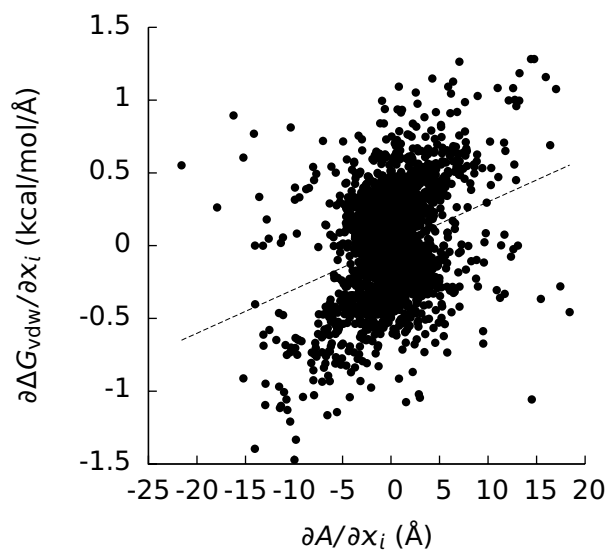

(b)

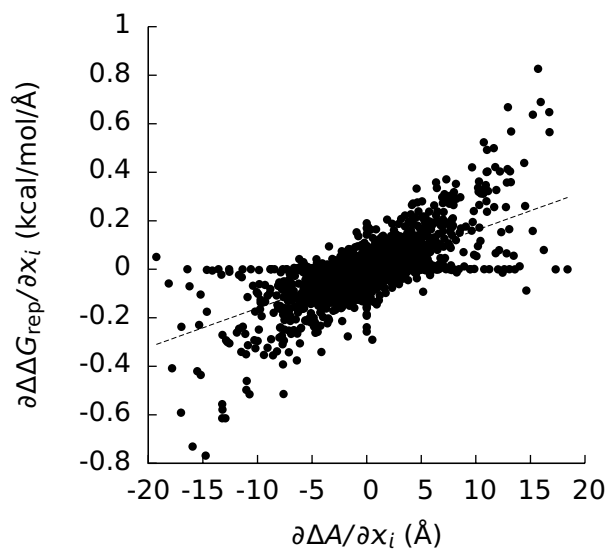

(c)

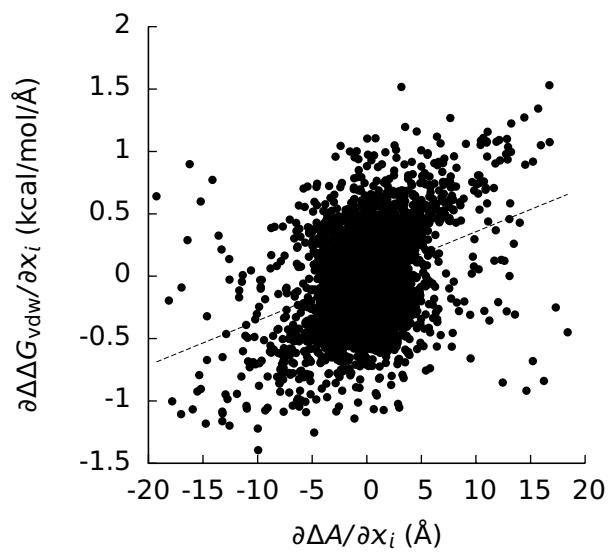

(d)

Figure 19: a) The derivative ( $\partial\Delta G_{\text{rep}}/\partial x_i$ ) of the repulsive component ( $\Delta G_{\text{rep}}$ ) of the Lennard-Jones cavity insertion free energy ( $\Delta G_{\text{vdw}}$ ) with respect to the coordinates ( $x_i$ ) of the atomic centers versus the derivative ( $\partial A/\partial x_i$ ) of the solvent-accessible area ( $A$ ) with respect to  $x_i$  for the 1UDI complex. b)  $\partial\Delta G_{\text{vdw}}/\partial x_i$  versus  $\partial A/\partial x_i$  for the 1UDI complex. c) The derivative ( $\partial\Delta\Delta G_{\text{rep}}/\partial x_i$ ) of the repulsive component ( $\Delta\Delta G_{\text{rep}}$ ) of the Lennard-Jones component ( $\Delta\Delta G_{\text{vdw}}$ ) of the binding free energy with respect to  $x_i$  versus the derivative ( $\partial\Delta A/\partial x_i$ ) of the change ( $\Delta A$ ) in  $A$  upon binding with respect to  $x_i$  for the 1UDI complex. d)  $\partial\Delta\Delta G_{\text{vdw}}/\partial x_i$  versus  $\partial\Delta A/\partial x_i$  for the 1UDI complex. The dotted lines are least-squares lines drawn through the data. The slopes and squares of the Pearson correlation coefficients of these lines can be found in Table 1 of the main text.

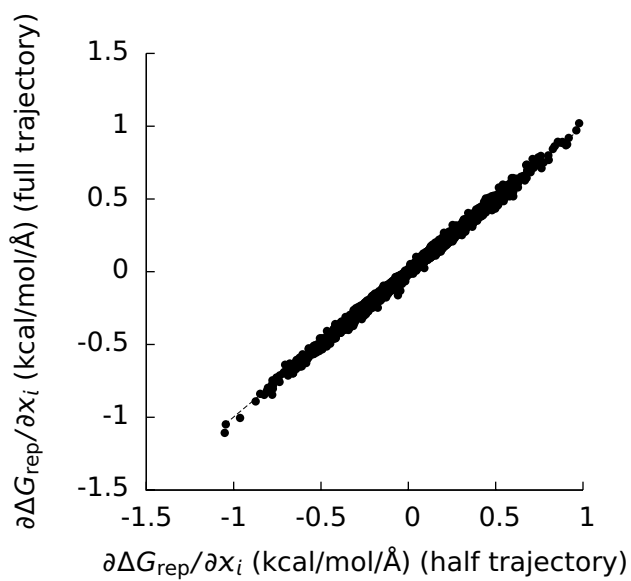

(a)

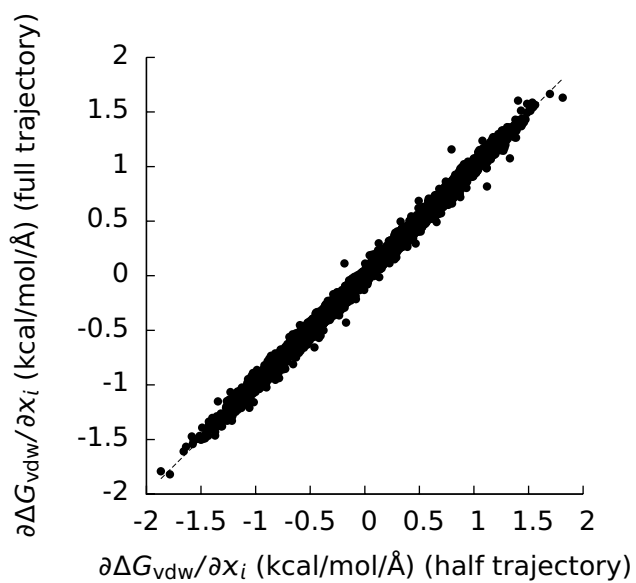

(b)

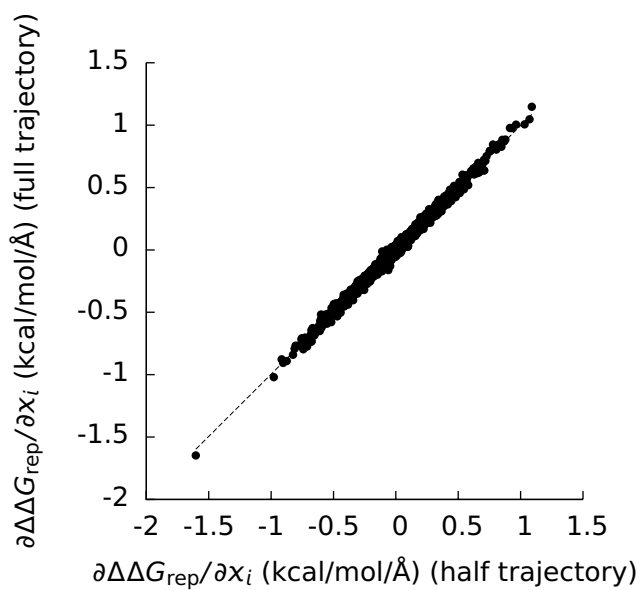

(c)

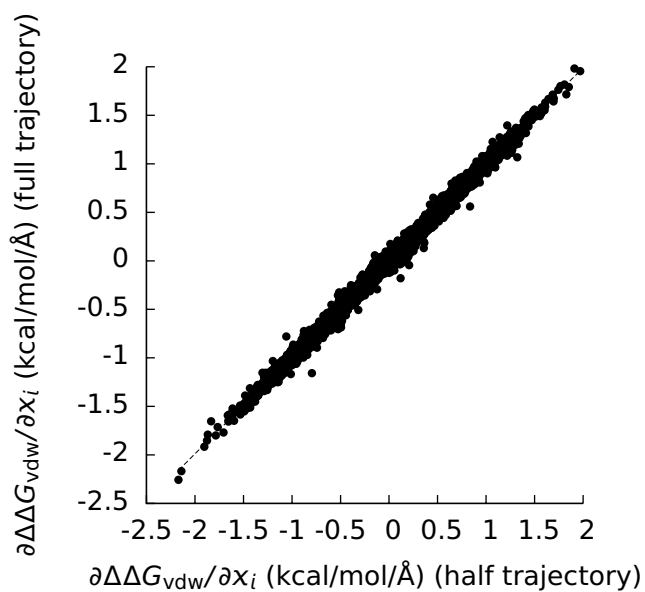

(d)

Figure 20: a) The derivatives ( $\partial\Delta G_{\text{rep}}/\partial x_i$ ) of the repulsive component ( $\Delta G_{\text{rep}}$ ) of the Lennard-Jones cavity insertion free energy ( $\Delta G_{\text{vdw}}$ ) with respect to the coordinates ( $x_i$ ) of the atomic centers versus the same quantity computed from the first halves of the molecular dynamics trajectories for the 9 protein-protein complexes and their components. b)  $\partial\Delta G_{\text{vdw}}/\partial x_i$  versus the same quantity computed from the first halves of the molecular dynamics trajectories for the 9 protein-protein complexes and their components. c) The derivatives ( $\partial\Delta\Delta G_{\text{rep}}/\partial x_i$ ) of the repulsive contribution ( $\Delta\Delta G_{\text{rep}}$ ) of the Lennard-Jones contribution ( $\Delta\Delta G_{\text{vdw}}$ ) of the binding free energy with respect to  $x_i$  versus the same quantity computed from the first halves of the molecular dynamics trajectories for the 9 protein-protein complexes and their components. d)  $\partial\Delta\Delta G_{\text{vdw}}/\partial x_i$  versus the same quantity computed from the first halves of the molecular dynamics trajectories for the 9 protein-protein complexes and their components. The dashed lines are least-squares lines drawn through the data. The slopes ( $m$ ) and the squares ( $R^2$ ) of the Pearson correlation coefficients for these lines are: a)  $m = 1.00$  and  $R^2 = 0.99$ , b)  $m = 1.00$  and  $R^2 = 1.00$ , c)  $m = 1.00$  and  $R^2 = 0.99$ , and d)  $m = 0.99$  and  $R^2 = 0.99$ .

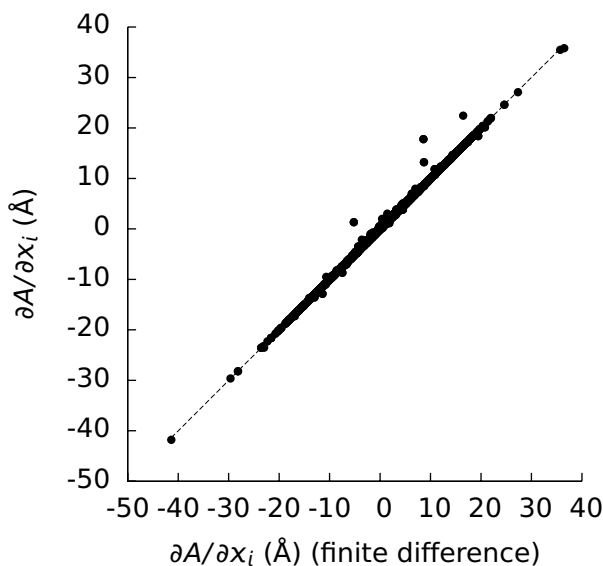

Figure 21: The derivatives ( $\partial A/\partial x_i$ ) of the solvent-accessible surface areas ( $A$ ) of the protein-protein complexes and their components with respect to the atomic coordinates ( $x_i$ ) plotted against finite-difference estimates of  $\partial A/\partial x_i$  obtained by shifting each atom in each direction by  $0.01 \text{ \AA}$ . The dashed line is a least-squares line drawn through the data. The slope of the line and the square of the Pearson correlation coefficient are 1.00.

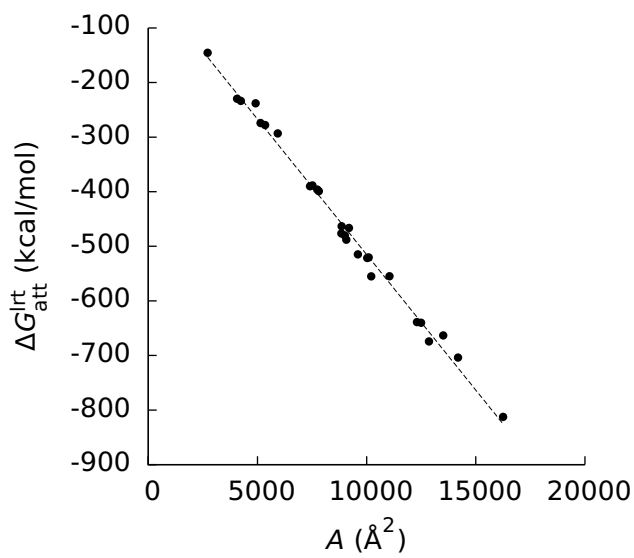

Figure 22: Linear response theory estimates ( $\Delta G_{\text{att}}^{\text{lrt}}$ ) of the attractive component of the free energy required to insert a Lennard-Jones cavity into solution for the nine protein-protein complexes and their components plotted against the solvent-accessible surface area. The dashed line is a least-squares line drawn through the points. Its slope is  $-0.050 \text{ kcal/mol/\text{Å}^2}$ , its y-intercept is  $-19 \text{ kcal/mol}$ , and the square of its Pearson's correlation coefficient is  $0.992$ .

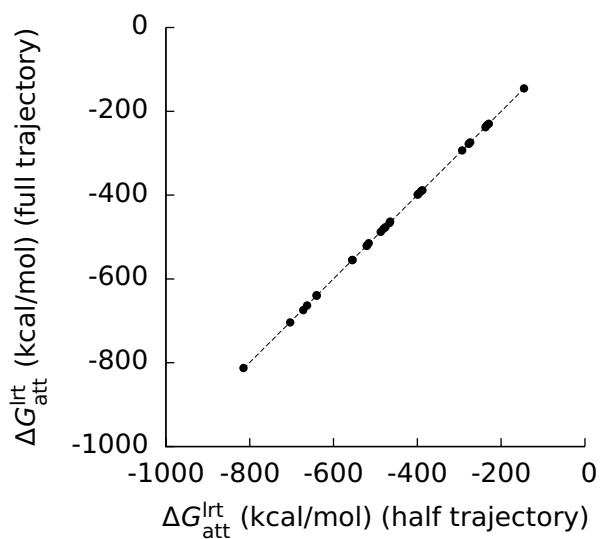



Figure 23: Linear response theory estimates ( $\Delta G_{\text{att}}^{\text{lrt}}$ ) of the attractive component of the free energy required to insert a Lennard-Jones cavity into solution for the nine protein-protein complexes and their components computed from the full simulation trajectories plotted against  $\Delta G_{\text{att}}^{\text{lrt}}$  computed from the first halves of the simulation trajectories. The dashed line is a least-squares line drawn through the points. Its slope is 0.999, its y-intercept is -0.6 kcal/mol, and the square of its Pearson's correlation coefficient is 0.99997.

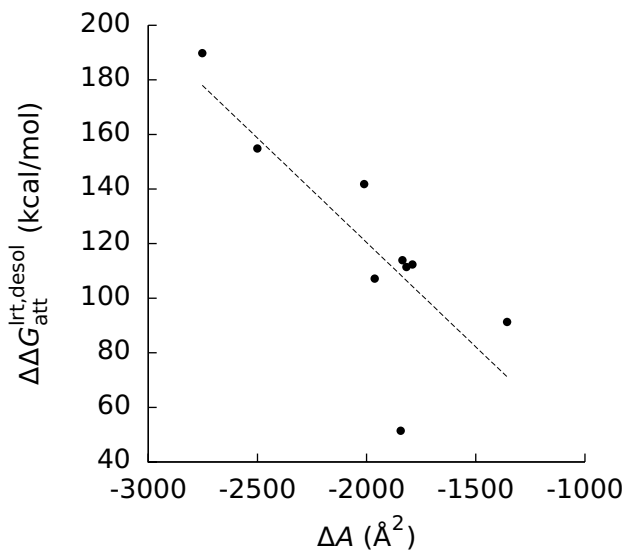

Figure 24: Linear response theory estimates ( $\Delta\Delta G_{\text{att}}^{\text{lrt}}$ ) of the attractive component of the desolvation free energy for the nine protein-protein complexes plotted against the change ( $\Delta A$ ) in the solvent-accessible surface area upon binding. The dashed line is a least-squares line drawn through the points. Its slope is  $-0.077$  kcal/mol/ $\text{\AA}$ , its y-intercept is  $-33$  kcal/mol, and the square of its Pearson's correlation coefficient is 0.64.

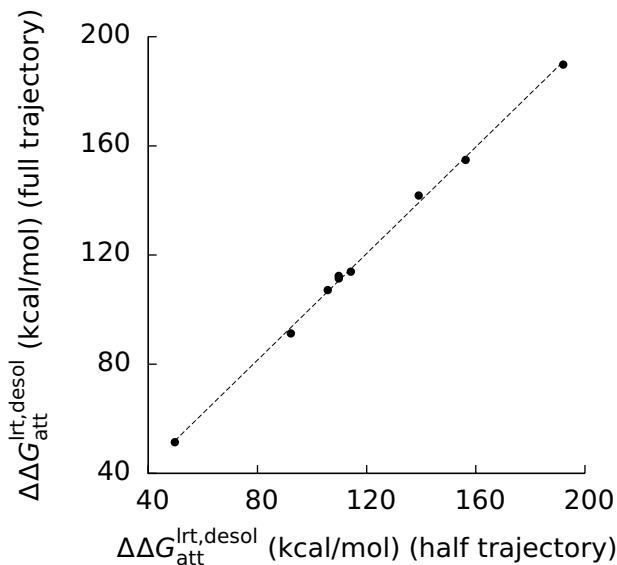

Figure 25: Linear response theory estimates ( $\Delta\Delta G_{\text{att}}^{\text{lrt,desol}}$ ) of the attractive component of the desolvation free energy for the nine protein-protein complexes computed from the full simulation trajectories plotted against  $\Delta\Delta G_{\text{att}}^{\text{lrt,desol}}$  computed from the first halves of the simulation trajectories. The dashed line is a least-squares line drawn through the points. Its slope is 0.98, its y-intercept is 3.4 kcal/mol, and the square of its Pearson's correlation coefficient is 0.998.

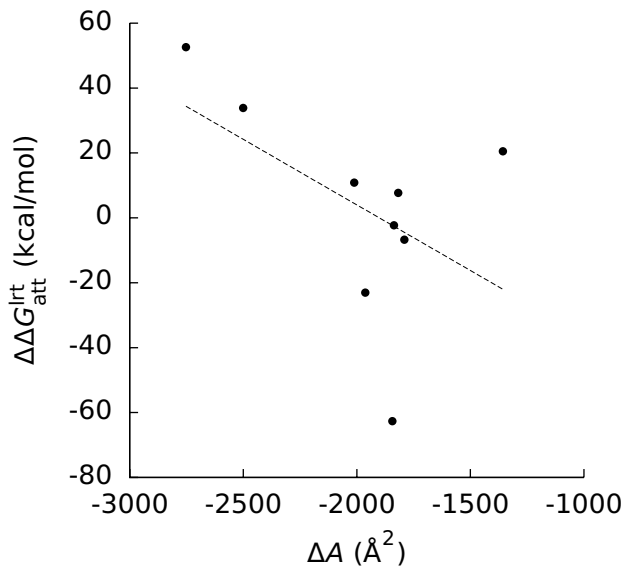

Figure 26: Linear response theory estimates ( $\Delta\Delta G_{\text{att}}^{\text{lrt}}$ ) of the attractive component of the binding free energy for the nine protein-protein complexes plotted against the change ( $\Delta A$ ) in the solvent-accessible surface area upon binding. The dashed line is a least-squares line drawn through the points. Its slope is  $-0.040$  kcal/mol/ $\text{\AA}$ , its y-intercept is  $-77$  kcal/mol, and the square of its Pearson's correlation coefficient is 0.25.

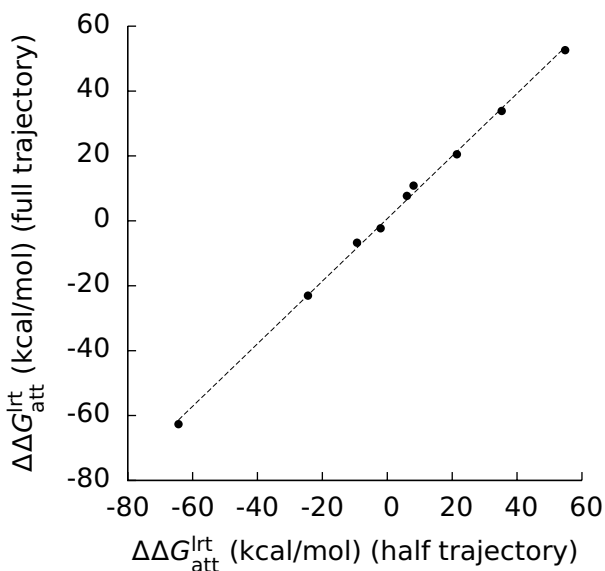

Figure 27: Linear response theory estimates ( $\Delta\Delta G_{\text{att}}^{\text{lrt}}$ ) of the attractive component of the binding free energy for the nine protein-protein complexes computed from the full simulation trajectories plotted against  $\Delta\Delta G_{\text{att}}^{\text{lrt}}$  computed from the first halves of the simulation trajectories. The dashed line is a least-squares line drawn through the points. Its slope is 0.96, its y-intercept is 0.69 kcal/mol, and the square of its Pearson's correlation coefficient is 0.998.

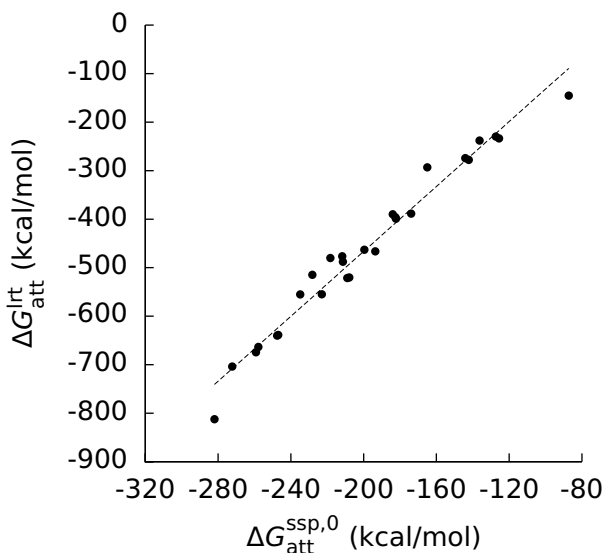

Figure 28: Linear response theory estimates ( $\Delta G_{\text{att}}^{\text{lrt}}$ ) of the attractive component ( $\Delta G_{\text{att}}$ ) of the free energy required to insert a Lennard-Jones cavity into solution for the nine protein-protein complexes plotted against estimates ( $\Delta G_{\text{att}}^{\text{ssp},0}$ ) of  $\Delta G_{\text{att}}$  obtained with single step perturbation using the initial configuration of solvent. The dashed line is a least-squares line drawn through the points. Its slope is 3.4, its y-intercept is 203 kcal/mol, and the square of its Pearson's correlation coefficient is 0.97.

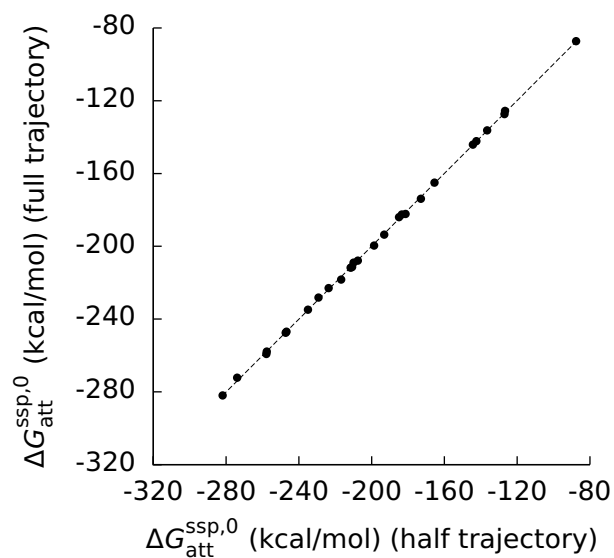

Figure 29: Single step perturbation estimates ( $\Delta\Delta G_{\text{att}}^{\text{ssp},0}$ ) of the attractive component of the binding free energy using the initial configurations of the solvent for the nine protein-protein complexes computed from the full simulation trajectories plotted against  $\Delta\Delta G_{\text{att}}^{\text{ssp},0}$  computed from the first halves of the simulation trajectories. The dashed line is a least-squares line drawn through the points. Its slope is 1.001, its y-intercept is 0.30 kcal/mol, and the square of its Pearson's correlation coefficient is 0.997.

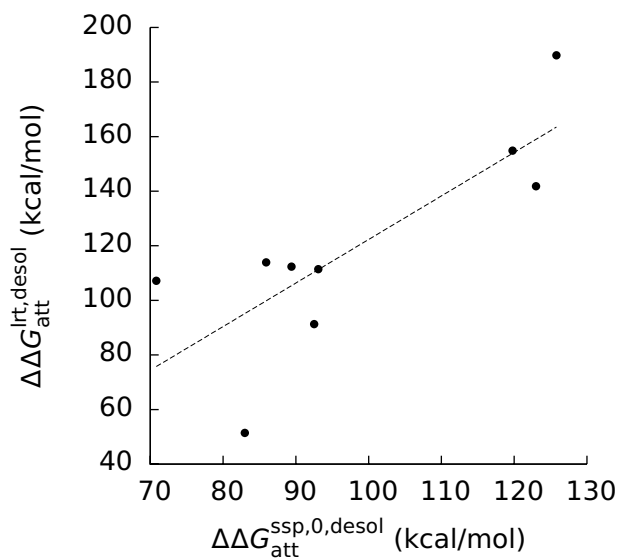

Figure 30: Linear response theory estimates ( $\Delta\Delta G_{\text{att}}^{\text{lrt,desol}}$ ) of the attractive component ( $\Delta\Delta G_{\text{att}}^{\text{desol}}$ ) of the desolvation free energy for the nine protein-protein complexes plotted against estimates ( $\Delta\Delta G_{\text{att}}^{\text{ssp},0}$ ) of  $\Delta\Delta G_{\text{att}}^{\text{desol}}$  obtained with single step perturbation using the initial configuration of solvent. The dashed line is a least-squares line drawn through the points. Its slope is 1.60, its y-intercept is -37 kcal/mol, and the square of its Pearson's correlation coefficient is 0.64.

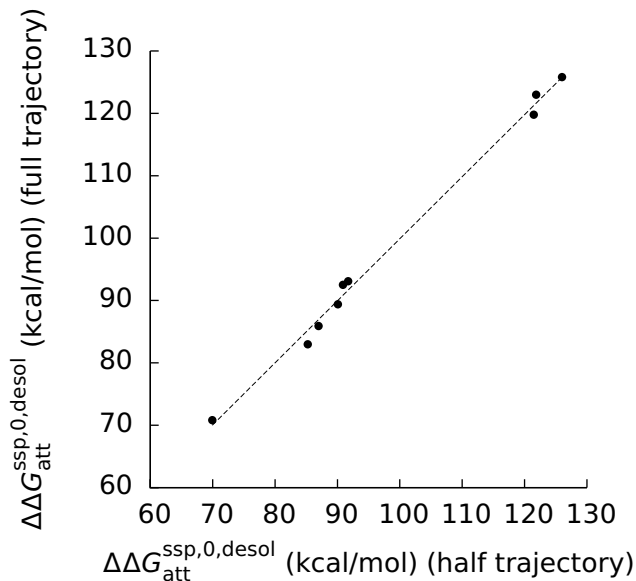

Figure 31: Single step perturbation estimates ( $\Delta\Delta G_{\text{att}}^{\text{ssp},0}$ ) of the attractive component of the desolvation free energy using the initial configurations of the solvent for the nine protein-protein complexes computed from the full simulation trajectories plotted against  $\Delta\Delta G_{\text{att}}^{\text{ssp},0}$  computed from the first halves of the simulation trajectories. The dashed line is a least-squares line drawn through the points. Its slope is 0.995, its y-intercept is 0.43 kcal/mol, and the square of its Pearson's correlation coefficient is 0.995.

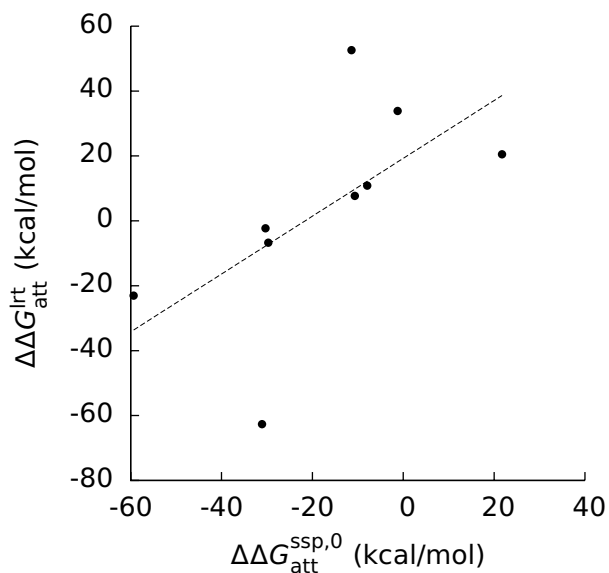

Figure 32: Linear response theory estimates ( $\Delta\Delta G_{\text{att}}^{\text{lrt}}$ ) of the attractive component ( $\Delta\Delta G_{\text{att}}$ ) of the binding free energy for the nine protein-protein complexes plotted against estimates ( $\Delta\Delta G_{\text{att}}^{\text{ssp},0}$ ) of  $\Delta\Delta G_{\text{att}}$  obtained with single step perturbation using the initial configuration of solvent. The dashed line is a least-squares line drawn through the points. Its slope is 0.89, its y-intercept is 19 kcal/mol, and the square of its Pearson's correlation coefficient is 0.38.

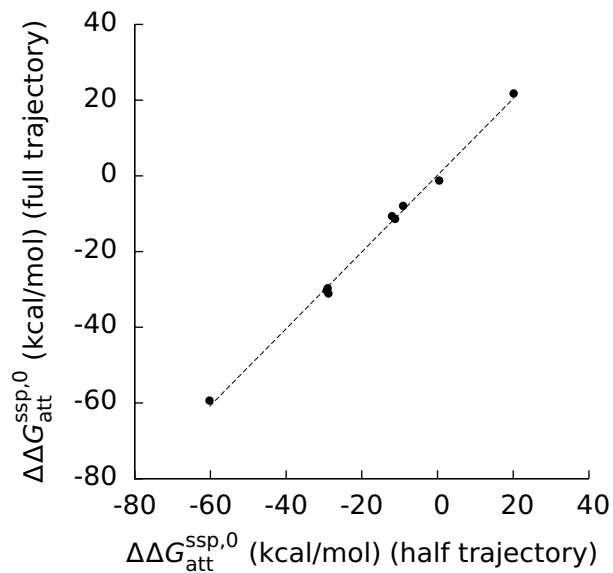

Figure 33: Single step perturbation estimates ( $\Delta\Delta G_{\text{att}}^{\text{ssp},0}$ ) of the attractive component of the binding free energy using the initial configurations of the solvent for the nine protein-protein complexes computed from the full simulation trajectories plotted against  $\Delta\Delta G_{\text{att}}^{\text{ssp},0}$  computed from the first halves of the simulation trajectories. The dashed line is a least-squares line drawn through the points. Its slope is 1.01, its y-intercept is 0.14 kcal/mol, and the square of its Pearson's correlation coefficient is 0.996.

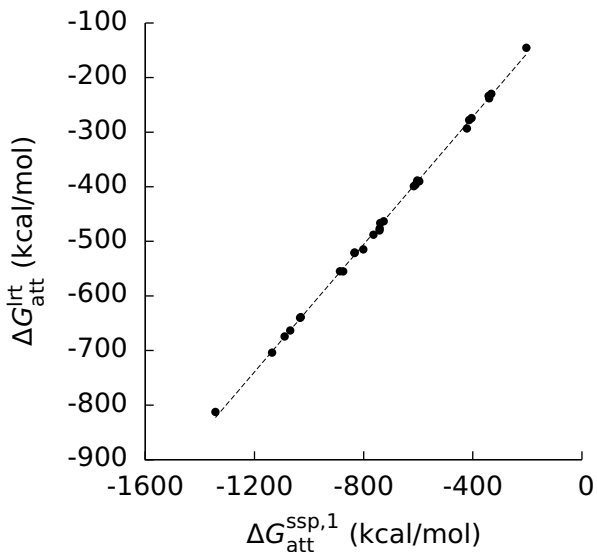

Figure 34: Linear response theory estimates ( $\Delta G_{\text{att}}^{\text{lrt}}$ ) of the attractive component ( $\Delta G_{\text{att}}$ ) of the free energy required to insert a Lennard-Jones cavity into solution for the nine protein-protein complexes plotted against estimates ( $\Delta G_{\text{att}}^{\text{ssp},1}$ ) of  $\Delta G_{\text{att}}$  obtained with single step perturbation using the final configuration of solvent. The dashed line is a least-squares line drawn through the points. Its slope is 0.58, its y-intercept is -38 kcal/mol, and the square of its Pearson's correlation coefficient is 0.9991.

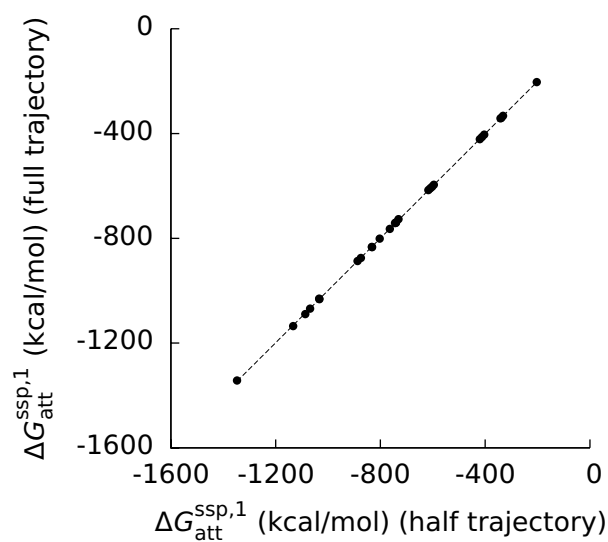

Figure 35: Single step perturbation estimates ( $\Delta\Delta G_{\text{att}}^{\text{ssp},1}$ ) of the attractive component of the binding free energy using the final configurations of the solvent for the nine protein-protein complexes computed from the full simulation trajectories plotted against  $\Delta\Delta G_{\text{att}}^{\text{ssp},1}$  computed from the first halves of the simulation trajectories. The dashed line is a least-squares line drawn through the points. Its slope is 0.998, its y-intercept is -1.25 kcal/mol, and the square of its Pearson's correlation coefficient is 0.99996.

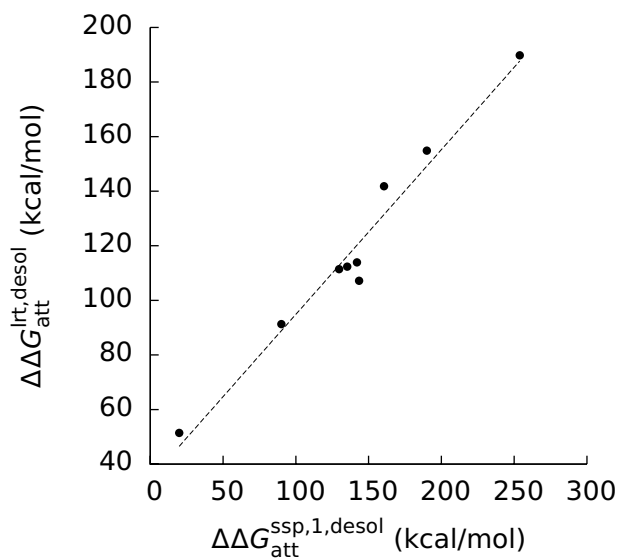



Figure 36: Linear response theory estimates ( $\Delta\Delta G_{\text{att}}^{\text{lrt,desol}}$ ) of the attractive component ( $\Delta\Delta G_{\text{att}}^{\text{desol}}$ ) of the desolvation free energy for the nine protein-protein complexes plotted against estimates ( $\Delta\Delta G_{\text{att}}^{\text{ssp},1}$ ) of  $\Delta\Delta G_{\text{att}}^{\text{desol}}$  obtained with single step perturbation using the final configuration of solvent. The dashed line is a least-squares line drawn through the points. Its slope is 0.60, its y-intercept is 35 kcal/mol, and the square of its Pearson's correlation coefficient is 0.97.

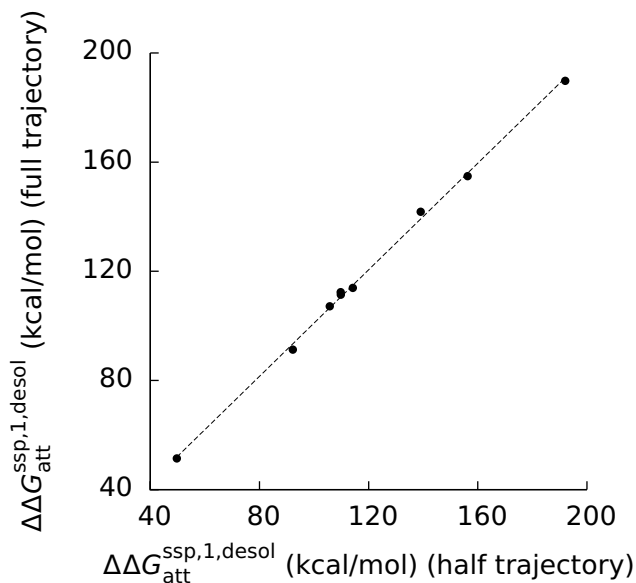

Figure 37: Single step perturbation estimates ( $\Delta\Delta G_{\text{att}}^{\text{ssp},1}$ ) of the attractive component of the desolvation free energy using the final configurations of the solvent for the nine protein-protein complexes computed from the full simulation trajectories plotted against  $\Delta\Delta G_{\text{att}}^{\text{ssp},1}$  computed from the first halves of the simulation trajectories. The dashed line is a least-squares line drawn through the points. Its slope is 0.98, its y-intercept is 3.41 kcal/mol, and the square of its Pearson's correlation coefficient is 0.998.

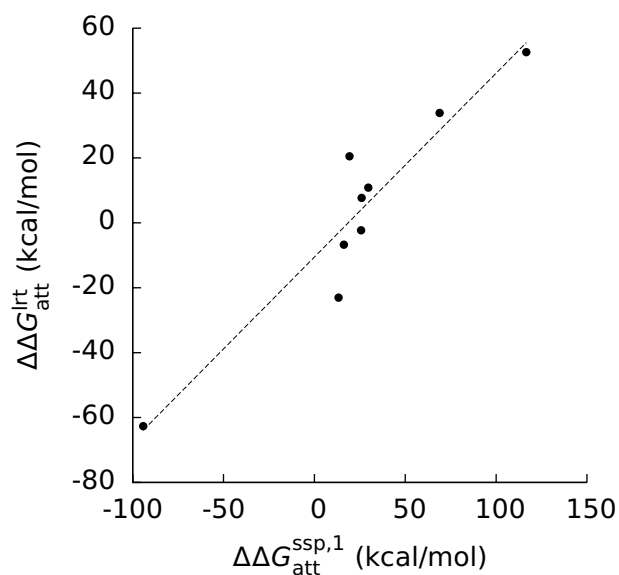

Figure 38: Linear response theory estimates ( $\Delta\Delta G_{\text{att}}^{\text{lrt}}$ ) of the attractive component ( $\Delta\Delta G_{\text{att}}$ ) of the binding free energy for the nine protein-protein complexes plotted against estimates ( $\Delta\Delta G_{\text{att}}^{\text{ssp},1}$ ) of  $\Delta\Delta G_{\text{att}}$  obtained with single step perturbation using the final configurations of solvent. The dashed line is a least-squares line drawn through the points. Its slope is 0.57, its y-intercept is -10.5 kcal/mol, and the square of its Pearson's correlation coefficient is 0.89.

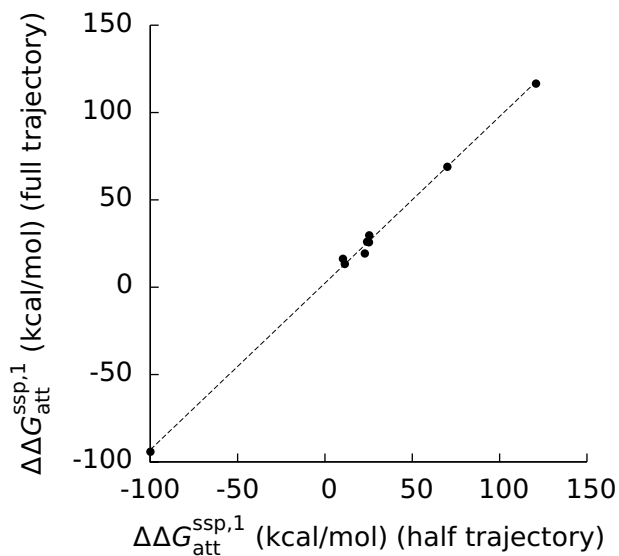

Figure 39: Single step perturbation estimates ( $\Delta\Delta G_{\text{att}}^{\text{ssp},1}$ ) of the attractive component of the binding free energy using the final configurations of the solvent for the nine protein-protein complexes computed from the full simulation trajectories plotted against  $\Delta\Delta G_{\text{att}}^{\text{ssp},1}$  computed from the first halves of the simulation trajectories. The dashed line is a least-squares line drawn through the points. Its slope is 0.95, its y-intercept is 2.34 kcal/mol, and the square of its Pearson's correlation coefficient is 0.998.

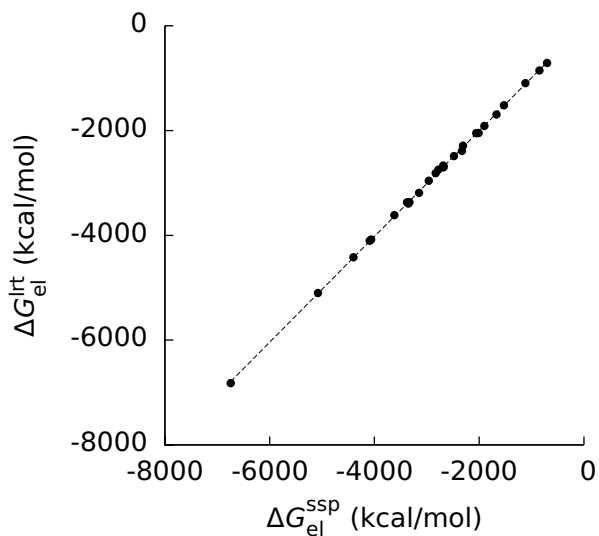

Figure 40: Linear response theory estimates ( $\Delta G_{\text{el}}^{\text{lrt}}$ ) of the electrostatic component ( $\Delta G_{\text{el}}$ ) of the solvation free energy for the nine protein-protein complexes and their components plotted against estimates ( $\Delta G_{\text{el}}^{\text{ssp}}$ ) of  $\Delta G_{\text{el}}$  obtained with single step perturbation using the final configuration of solvent. The dashed line is a least-squares line drawn through the points. Its slope is 1.01, its y-intercept is 16 kcal/mol, and the square of its Pearson's correlation coefficient is 0.9997.

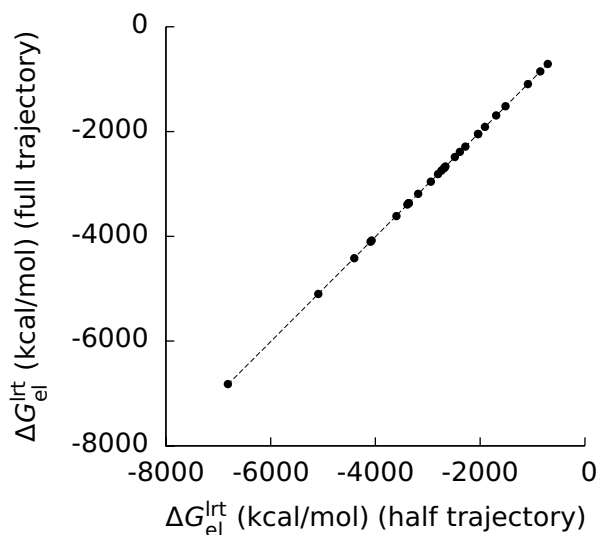

Figure 41: Linear response theory estimates ( $\Delta G_{el}^{lrt}$ ) of the electrostatic component of the solvation free energy for the nine protein-protein complexes and their components computed from the full simulation trajectories plotted against  $\Delta G_{el}^{lrt}$  computed from the first halves of the simulation trajectories. The dashed line is a least-squares line drawn through the points. Its slope is 1.002, its y-intercept is -0.97 kcal/mol, and the square of its Pearson's correlation coefficient is 0.99999.

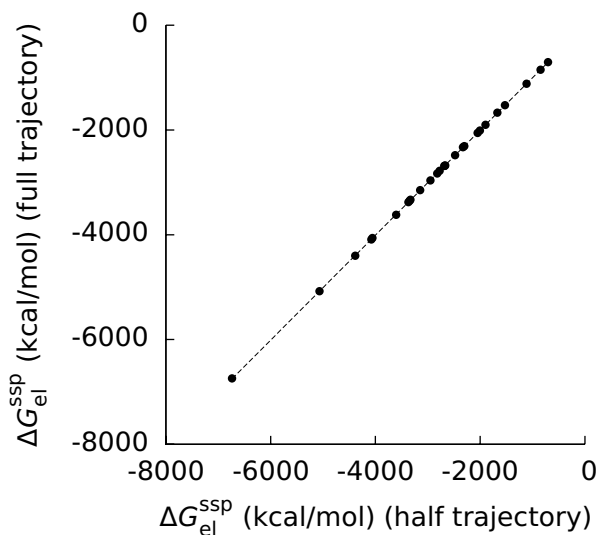

Figure 42: Single step perturbation estimates ( $\Delta G_{el}^{ssp}$ ) of the electrostatic component of the solvation free energy for the nine protein-protein complexes and their components computed from the full simulation trajectories plotted against  $\Delta G_{el}^{ssp}$  computed from the first halves of the simulation trajectories. The dashed line is a least-squares line drawn through the points. Its slope is 1.002, its y-intercept is -0.17 kcal/mol, and the square of its Pearson's correlation coefficient is 0.99999.

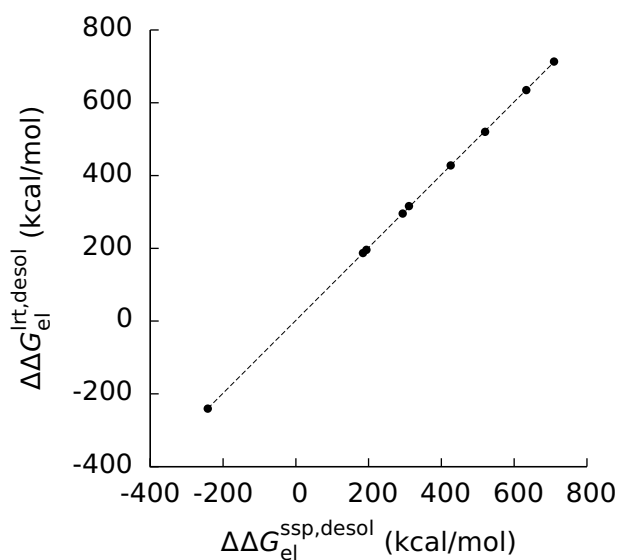

Figure 43: Linear response theory estimates ( $\Delta\Delta G_{el}^{lrt,desol}$ ) of the electrostatic component ( $\Delta\Delta G_{el}^{desol}$ ) of the desolvation free energy for the nine protein-protein complexes plotted against estimates ( $\Delta\Delta G_{el}^{ssp,desol}$ ) of  $\Delta\Delta G_{el}^{desol}$  obtained with single step perturbation using the final configuration of solvent. The dashed line is a least-squares line drawn through the points. Its slope is 1.0007, its y-intercept is 2.0 kcal/mol, and the square of its Pearson's correlation coefficient is 0.99997.

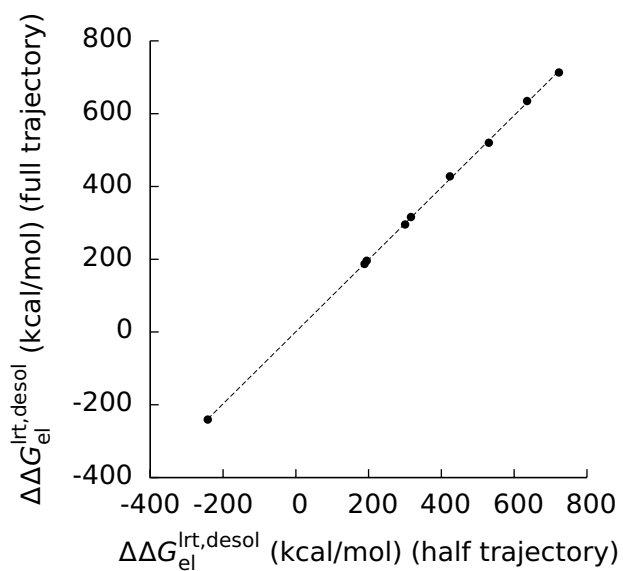

Figure 44: Linear response theory estimates ( $\Delta\Delta G_{\text{el}}^{\text{lrt,desol}}$ ) of the electrostatic component of the desolvation free energy for the nine protein-protein complexes computed from the full simulation trajectories plotted against  $\Delta\Delta G_{\text{el}}^{\text{lrt,desol}}$  computed from the first halves of the simulation trajectories. The dashed line is a least-squares line drawn through the points. Its slope is 0.991, its y-intercept is 0.72 kcal/mol, and the square of its Pearson's correlation coefficient is 0.9998.

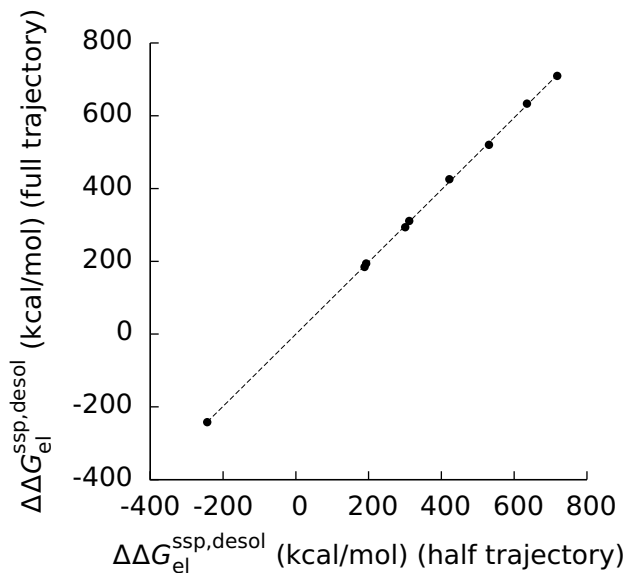

Figure 45: Single step perturbation estimates ( $\Delta\Delta G_{\text{el}}^{\text{ssp,desol}}$ ) of the electrostatic component of the desolvation free energy for the nine protein-protein complexes computed from the full simulation trajectories plotted against  $\Delta\Delta G_{\text{el}}^{\text{ssp,desol}}$  computed from the first halves of the simulation trajectories. The dashed line is a least-squares line drawn through the points. Its slope is 0.992, its y-intercept is -0.23 kcal/mol, and the square of its Pearson's correlation coefficient is 0.9998.

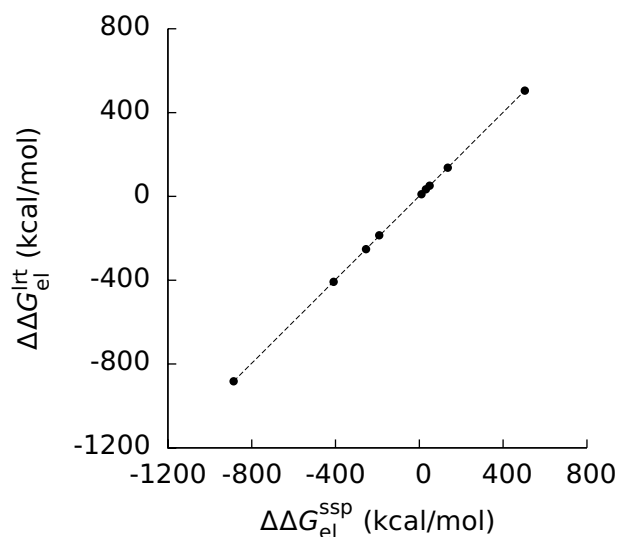

Figure 46: Linear response theory estimates ( $\Delta\Delta G_{\text{el}}^{\text{lrt}}$ ) of the electrostatic component ( $\Delta\Delta G_{\text{el}}$ ) of the binding free energy for the nine protein-protein complexes plotted against estimates ( $\Delta\Delta G_{\text{el}}^{\text{ssp}}$ ) of  $\Delta\Delta G_{\text{el}}$  obtained with single step perturbation using the final configuration of solvent. The dashed line is a least-squares line drawn through the points. Its slope is 0.998, its y-intercept is 2.0 kcal/mol, and the square of its Pearson's correlation coefficient is 0.99999.

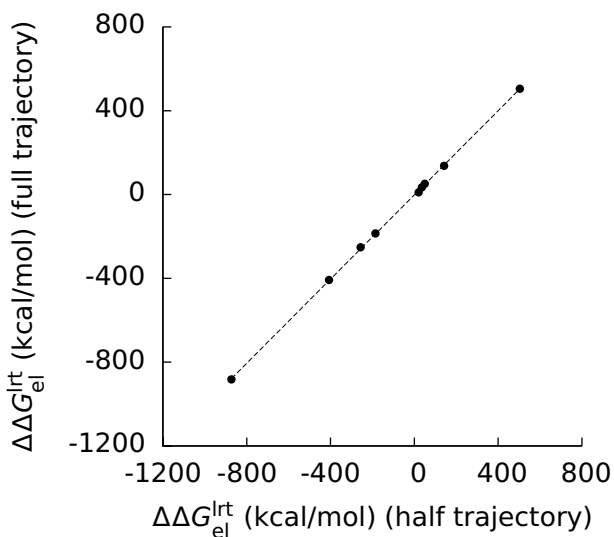

Figure 47: Linear response theory estimates ( $\Delta\Delta G_{\text{el}}^{\text{lrt}}$ ) of the electrostatic component of the binding free energy for the nine protein-protein complexes computed from the full simulation trajectories plotted against  $\Delta\Delta G_{\text{el}}^{\text{lrt}}$  computed from the first halves of the simulation trajectories. The dashed line is a least-squares line drawn through the points. Its slope is 1.004, its y-intercept is -1.88 kcal/mol, and the square of its Pearson's correlation coefficient is 0.9999.

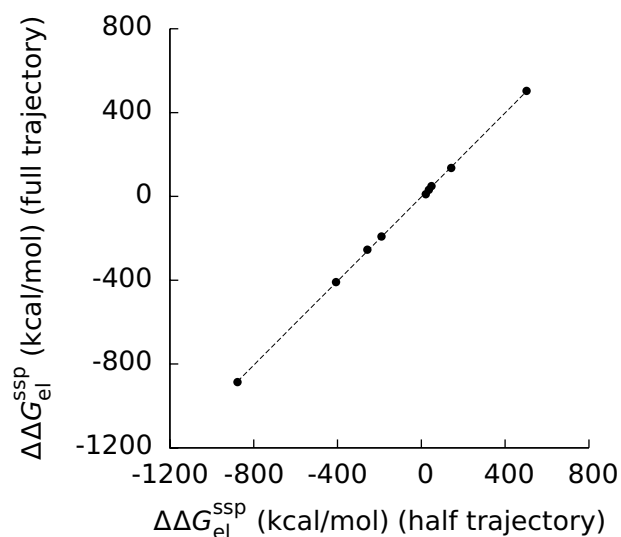

Figure 48: Single step perturbation estimates ( $\Delta\Delta G_{el}^{ssp}$ ) of the electrostatic component of the binding free energy for the nine protein-protein complexes computed from the full simulation trajectories plotted against  $\Delta\Delta G_{el}^{ssp}$  computed from the first halves of the simulation trajectories. The dashed line is a least-squares line drawn through the points. Its slope is 1.003, its y-intercept is -2.73 kcal/mol, and the square of its Pearson's correlation coefficient is 0.9999.

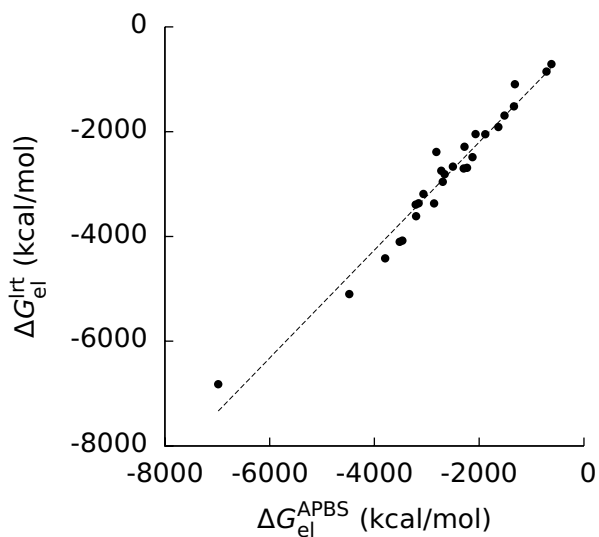

Figure 49: Linear response theory estimates ( $\Delta G_{el}^{lrt}$ ) of the electrostatic component ( $\Delta G_{el}$ ) of the solvation free energy for the nine protein-protein complexes and their components plotted against estimates ( $\Delta G_{el}^{APBS}$ ) of  $\Delta G_{el}$  obtained with the Adaptive Poisson-Boltzmann Solver and a mesh spacing of 0.5 Å. The dashed line is a least-squares line drawn through the points. Its slope is 1.03, its y-intercept is -138 kcal/mol, and the square of its Pearson's correlation coefficient is 0.96.



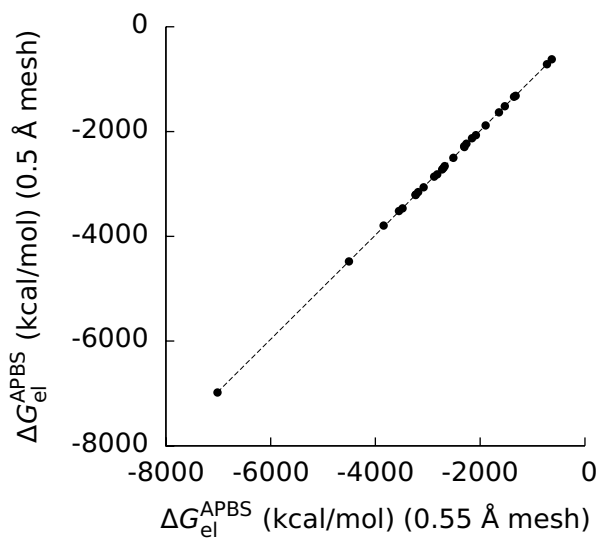

Figure 50: Estimates ( $\Delta G_{el}^{SSP}$ ) of the electrostatic component of the solvation free energy obtained with the Adaptive Poisson-Boltzman Solver (APBS) and a mesh spacing of 0.5 Å for the nine protein-protein complexes and their components plotted against  $\Delta G_{el}^{APBS}$  computed with a mesh spacing of 0.55 Å. The dashed line is a least-squares line drawn through the points. Its slope is 0.995, its y-intercept is 5.50 kcal/mol, and the square of its Pearson's correlation coefficient is 0.99994.

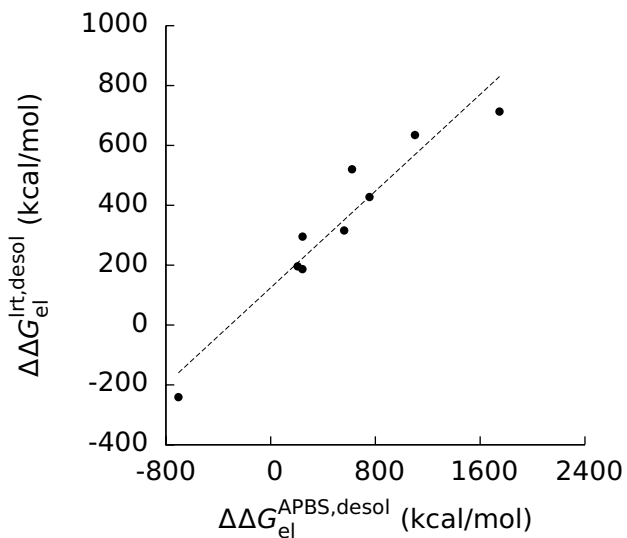

Figure 51: Linear response theory estimates ( $\Delta\Delta G_{\text{el}}^{\text{lrt,desol}}$ ) of the electrostatic component ( $\Delta\Delta G_{\text{el}}^{\text{desol}}$ ) of the desolvation free energy for the nine protein-protein complexes plotted against estimates ( $\Delta\Delta G_{\text{el}}^{\text{APBS,desol}}$ ) of  $\Delta\Delta G_{\text{el}}^{\text{desol}}$  obtained with the Adaptive Poisson-Boltzmann Solver and a mesh spacing of 0.5 Å. The dashed line is a least-squares line drawn through the points. Its slope is 0.40, its y-intercept is 125 kcal/mol, and the square of its Pearson's correlation coefficient is 0.92.

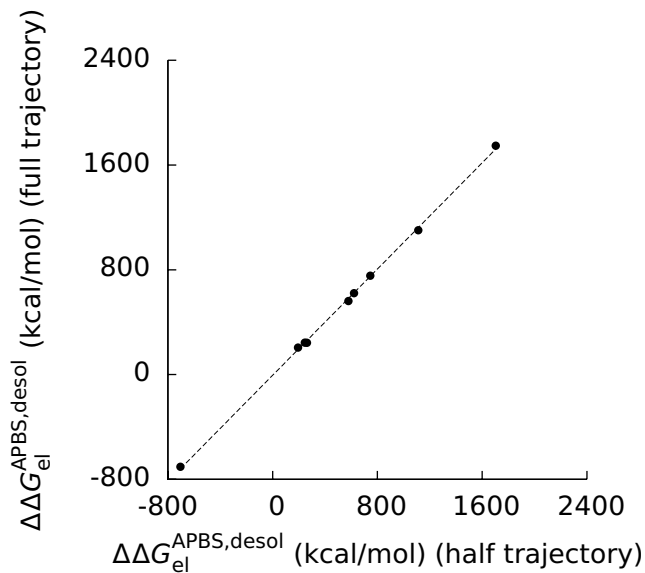

Figure 52: Estimates ( $\Delta\Delta G_{\text{el}}^{\text{APBS}}$ ) of the electrostatic component of the desolvation free energy for the nine protein-protein complexes computed with the Adaptive Poisson-Boltzmann Solver (APBS) and a mesh spacing of 0.5 Å plotted against  $\Delta\Delta G_{\text{el}}^{\text{APBS}}$  computed with a mesh spacing of 0.55 Å. The dashed line is a least-squares line drawn through the points. Its slope is 1.01, its y-intercept is -5.36 kcal/mol, and the square of its Pearson's correlation coefficient is 0.9993.

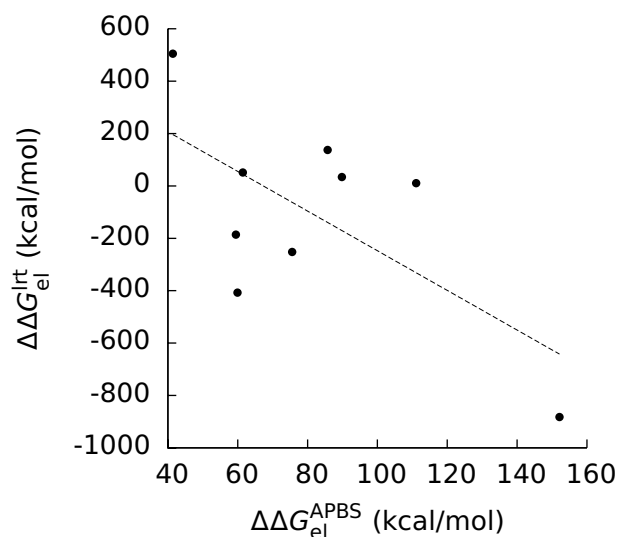

Figure 53: Linear response theory estimates ( $\Delta\Delta G_{el}^{lrt}$ ) of the electrostatic component ( $\Delta\Delta G_{el}$ ) of the binding free energy for the nine protein-protein complexes plotted against estimates ( $\Delta\Delta G_{el}^{APBS}$ ) of  $\Delta\Delta G_{el}$  obtained with the Adaptive Poisson-Boltzmann Solver and a mesh spacing of 0.5 Å. The dashed line is a least-squares line drawn through the points. Its slope is -7.57, its y-intercept is 510 kcal/mol, and the square of its Pearson's correlation coefficient is 0.42.

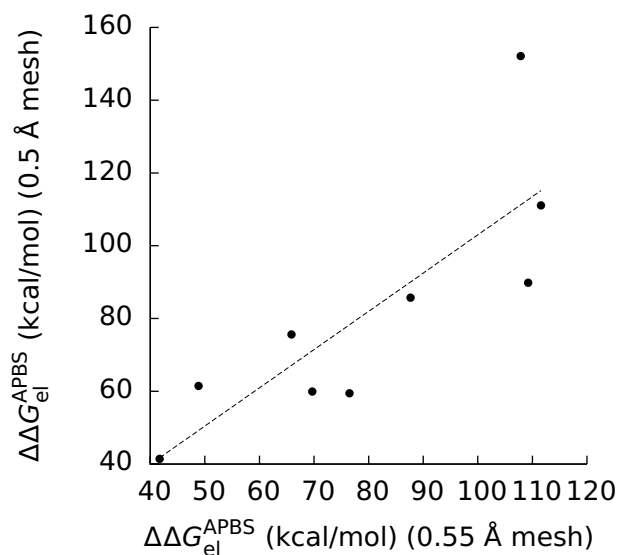

Figure 54: Estimates ( $\Delta\Delta G_{el}^{APBS}$ ) of the electrostatic component of the binding free energy for the nine protein-protein complexes computed with the Adaptive Poisson-Boltzmann Solver (APBS) and a mesh spacing of 0.5 Å plotted against  $\Delta\Delta G_{el}^{APBS}$  computed with a mesh spacing of 0.55 Å. The dashed line is a least-squares line drawn through the points. Its slope is 1.05, its y-intercept is -2.09 kcal/mol, and the square of its Pearson's correlation coefficient is 0.67.
